# Supplementary material for: Significant geometry and charge difference between the E54− bare clusters of group 14 Zintl anions and their coordinated form in [E5{M(CO)3}2]4− (E = Si, Ge, Sn, Pb; M = Cr, Mo, W) complexes
Source: Royal Society of Chemistry journal article supplement (doi:10.1039/c9nj00162j), 2019-01-01
Supplement: c9nj00162j1.pdf [file c9nj00162j1.pdf]

# Supplementary Information

for

**Significant geometry and charge difference between the  $E_5^{4-}$  bare clusters of Group 14 Zintl anions and their coordinated form in  $[E_5\{M(CO)_3\}_2]^{4-}$  (E=Si, Ge, Sn, Pb; M=Cr, Mo, W) complexes**

*Yasin Gholiee<sup>\*†</sup>, Sadegh Salehzadeh<sup>\*‡</sup> and Shiva Khodaveisi<sup>‡</sup>*

<sup>†</sup> Department of Chemistry, Faculty of Science, Malayer University, Malayer, Iran

<sup>‡</sup> Faculty of Chemistry, Bu-Ali Sina University, Hamedan, Iran

# List of Contents:

**Table S1.** Electronic energies (Hartree) for optimized structures for  $E_5^n$  ( $E = Si, Ge, Sn, Pb; n = -4, -2, 0$ ) clusters from different initial structures, at BP86/def2-TZVPP level of theory.

**Table S2.** Electronic energies (Hartree) for optimized structures for  $E_5^n$  ( $E = Si, Ge, Sn, Pb; n = -4, -2, 0$ ) clusters from different initial structures, at M06-2X/def2-TZVPP level of theory.

**Table S3.** The computed and experimental E–E distances (Å) and E–E–E angles (°) for trigonal bipyramid  $E_5^{2-}$  ( $E = Si, Ge, Sn, Pb$ ) clusters, at M06-2X/def2-TZVPP level of theory.

**Table S4.** The computed and experimental E–E distances (Å) and E–E–E angles (°) for trigonal bipyramid  $E_5^{2-}$  ( $E = Si, Ge, Sn, Pb$ ) clusters, at BP86/def2-TZVPP level of theory.

**Table S5.** Computed and experimental structural parameters for  $[Pb_5\{Mo(CO)_3\}_2]^{4-}$ .

**Table S6.** Computed bond lengths (Å) for  $[E_5\{Cr(CO)_3\}_2]^{4-}$  complexes ( $E=Si, Ge, Sn$  and  $Pb$ ), at M06-2X/def2-TZVPP level of theory.

**Table S7.** Computed bond lengths (Å) for  $[E_5\{Mo(CO)_3\}_2]^{4-}$  complexes ( $E=Si, Ge, Sn$  and  $Pb$ ), at M06-2X/def2-TZVPP level of theory.

**Table S8.** Computed bond lengths (Å) for  $[E_5\{W(CO)_3\}_2]^{4-}$  complexes ( $E=Si, Ge, Sn$  and  $Pb$ ), at M06-2X/def2-TZVPP level of theory.

**Table S9.** Calculated values of uncorrected interaction energies between the fragments (IE, kcal/mol), for  $[E_5\{M(CO)_3\}_2]^{4-}$ ; ( $E = Si, Ge, Sn$  and  $Pb$ ;  $M = Cr, Mo$  and  $W$ ) complexes, at M06-2X/def2-TZVPP level of theory.

**Table S10.** Calculated values of uncorrected interaction energies between the fragments (IE, kcal/mol), for  $[E_5\{M(CO)_3\}_2]^{4-}$ ; ( $E = Si, Ge, Sn$  and  $Pb$ ;  $M = Cr, Mo$  and  $W$ ) complexes, at BP86/def2-TZVPP level of theory.

**Table S11.** Calculated values of corrected interaction energies between the fragments (IE, kcal/mol), for  $[E_5\{M(CO)_3\}_2]^{4-}$ ; ( $E = Si, Ge, Sn$  and  $Pb$ ;  $M = Cr, Mo$  and  $W$ ) complexes, at BP86/def2-TZVPP level of theory.

**Table S12.** Wiberg bond indices (WBIs) for  $[E_5\{Cr(CO)_3\}_2]^{4-}$  at M06-2X/def2-TZVPP level of theory.

**Table S13.** Wiberg bond indices (WBIs) for  $[E_5\{Mo(CO)_3\}_2]^{4-}$  at M06-2X/def2-TZVPP level of theory.

**Table S14.** Wiberg bond indices (WBIs) for  $[E_5\{W(CO)_3\}_2]^{4-}$  at M06-2X/def2-TZVPP level of theory.

**Table S15.** Calculated frequencies ( $cm^{-1}$ ) for CO stretching bands in  $[E_5\{Cr(CO)_3\}_2]^{4-}$  complexes as well as bond lengths (Å) and Wiberg bond indices (WBIs) for M–C and C–O bonds.

**Table S16.** Calculated frequencies ( $cm^{-1}$ ) for CO stretching bands in  $[E_5\{Mo(CO)_3\}_2]^{4-}$  complexes as well as bond lengths (Å) and Wiberg bond indices (WBIs) for M–C and C–O bonds.

**Table S17.** Calculated frequencies ( $cm^{-1}$ ) for CO stretching bands in  $[E_5\{W(CO)_3\}_2]^{4-}$  complexes as well as bond lengths (Å) and Wiberg bond indices (WBIs) for M–C and C–O bonds.

**Table S18.** Energy decomposition analysis results between  $[E_5\{M(CO)_3\}_2]^{4-}$  and  $\{M(CO)_3\}$  fragments (A–BA') in  $[E_5\{M(CO)_3\}_2]^{4-}$  complexes ( $E=Si, Ge, Sn$  and  $Pb$ ;  $M=Cr, Mo$  and  $W$ ) at BP86-D3/TZP(ZORA) level of theory.

**Table S19.** Comparison of computed Ge–Ge distances (Å) for trigonal bipyramid  $Ge_5^{2-}$  cluster in Ref. 43 and in this study.

**Table S20.** Comparison of computed Ge–Ge distances (Å) for trigonal bipyramid  $Ge_5$  cluster in Ref. 43 and in this study.

**Figure S1.** Optimized structures of  $E_5^n$  ( $E = Si, Ge, Sn, Pb; n = -4, -2, 0$ ) clusters from square pyramid initial ( $C_{4v}$ ) geometry, at M06-2X/def2-TZVPP level of theory.

**Figure S2.** Optimized structures of  $E_5^n$  ( $E = Si, Ge, Sn, Pb; n = -4, -2, 0$ ) clusters from trigonal bipyramid ( $D_{3h}$ ) initial geometry, at M06-2X/def2-TZVPP level of theory.

**Figure S3.** Optimized structures of  $E_5^n$  ( $E = Si, Ge, Sn, Pb; n = -4, -2, 0$ ) clusters from planar pentagon ( $D_{5h}$ ) initial geometry, at M06-2X/def2-TZVPP level of theory.

**Figure S4.** Optimized structures of  $E_5^n$  ( $E = Si, Ge, Sn, Pb; n = -4, -2, 0$ ) clusters from square pyramid initial ( $C_{4v}$ ) geometry, at BP86/def2-TZVPP level of theory.

**Figure S5.** Optimized structures of  $E_5^n$  ( $E = Si, Ge, Sn, Pb; n = -4, -2, 0$ ) clusters from trigonal bipyramid ( $D_{3h}$ ) initial geometry, at BP86/def2-TZVPP level of theory.

**Figure S6.** Optimized structures of  $E_5^n$  ( $E = Si, Ge, Sn, Pb; n = -4, -2, 0$ ) clusters from planar pentagon ( $D_{5h}$ ) initial geometry, at BP86/def2-TZVPP level of theory.

**Figure S7.** Optimized structures for  $[Si_5\{Cr(CO)_3\}_2]^{4-}$  (a),  $[Ge_5\{Cr(CO)_3\}_2]^{4-}$  (b),  $[Sn_5\{Cr(CO)_3\}_2]^{4-}$  (c) and  $[Pb_5\{Cr(CO)_3\}_2]^{4-}$  (d) complexes, at M06-2X/def2-TZVPP level of theory.

**Figure S8.** Optimized structures for  $[Si_5\{Mo(CO)_3\}_2]^{4-}$  (a),  $[Ge_5\{Mo(CO)_3\}_2]^{4-}$  (b),  $[Sn_5\{Mo(CO)_3\}_2]^{4-}$  (c) and  $[Pb_5\{Mo(CO)_3\}_2]^{4-}$  (d) complexes, at M06-2X/def2-TZVPP level of theory.

**Figure S9.** Optimized structures for  $[Si_5\{W(CO)_3\}_2]^{4-}$  (a),  $[Ge_5\{W(CO)_3\}_2]^{4-}$  (b),  $[Sn_5\{W(CO)_3\}_2]^{4-}$  (c) and  $[Pb_5\{W(CO)_3\}_2]^{4-}$  (d) complexes, at M06-2X/def2-TZVPP level of theory.

**Figure S10.** Four highest occupied molecular orbitals for  $[Si_5\{Cr(CO)_3\}_2]^{4-}$  (a),  $[Ge_5\{Cr(CO)_3\}_2]^{4-}$  (b),  $[Sn_5\{Cr(CO)_3\}_2]^{4-}$  (c) and  $[Pb_5\{Cr(CO)_3\}_2]^{4-}$  (d) complexes, at M06-2X/def2-TZVPP level of theory.

**Figure S11.** Four highest occupied molecular orbitals for  $[Si_5\{Mo(CO)_3\}_2]^{4-}$  (a),  $[Ge_5\{Mo(CO)_3\}_2]^{4-}$  (b),  $[Sn_5\{Mo(CO)_3\}_2]^{4-}$  (c) and  $[Pb_5\{Mo(CO)_3\}_2]^{4-}$  (d) complexes, at M06-2X/def2-TZVPP level of theory.

**Figure S12.** Four highest occupied molecular orbitals for  $[Si_5\{W(CO)_3\}_2]^{4-}$  (a),  $[Ge_5\{W(CO)_3\}_2]^{4-}$  (b),  $[Sn_5\{W(CO)_3\}_2]^{4-}$  (c) and  $[Pb_5\{W(CO)_3\}_2]^{4-}$  (d) complexes, at M06-2X/def2-TZVPP level of theory.

**Figure S13.** Deformation densities associated with the first four important orbital interactions for  $[Si_5\{Cr(CO)_3\}_2]^{4-}$  (a),  $[Ge_5\{Cr(CO)_3\}_2]^{4-}$  (b),  $[Sn_5\{Cr(CO)_3\}_2]^{4-}$  (c) and  $[Pb_5\{Cr(CO)_3\}_2]^{4-}$  (d) complexes, at BP86-D3/TZP(ZORA) level of theory.

**Figure S14.** Deformation densities associated with the first four important orbital interactions for  $[Si_5\{Mo(CO)_3\}_2]^{4-}$  (a),  $[Ge_5\{Mo(CO)_3\}_2]^{4-}$  (b),  $[Sn_5\{Mo(CO)_3\}_2]^{4-}$  (c) and  $[Pb_5\{Mo(CO)_3\}_2]^{4-}$  (d) complexes, at BP86-D3/TZP(ZORA) level of theory.

**Figure S15.** Deformation densities associated with the first four important orbital interactions for (a),  $[Ge_5\{W(CO)_3\}_2]^{4-}$  (b),  $[Sn_5\{W(CO)_3\}_2]^{4-}$  (c) and  $[Pb_5\{W(CO)_3\}_2]^{4-}$  (d) complexes, at BP86-D3/TZP(ZORA) level of theory.

**Figure S16.** Optimized structures for  $[Mo(CO)_6]$  (a),  $[\eta^6-C_6H_6\{Mo(CO)_3\}]$  (b),  $[Mes\{Mo(CO)_3\}]$  (c) and  $[(\eta^5-C_5H_5)\{Mo(CO)_3\}_2]^-$  (d) complexes, at M06-2X/def2-TZVPP level of theory.

**Table S1.** Electronic energies (Hartree) for optimized structures for  $E_5^n$  ( $E = Si, Ge, Sn, Pb; n = -4, -2, 0$ ) clusters from different initial structures, at M06-2X/def2-TZVPP level of theory.

| Initial structure    | Cluster       |                |               |              |
|----------------------|---------------|----------------|---------------|--------------|
|                      | $Si_5^-$      | $Ge_5^-$       | $Sn_5^-$      | $Pb_5^-$     |
| Square pyramid       | -1447.3508614 | -10385.1097046 | -1071.3048338 | -963.8448469 |
| Triangular bipyramid | -1447.3508225 | -10385.1097059 | -1071.3048458 | -963.8684009 |
| Flat pentagon        | -1447.3063576 | -10385.0876782 | -1071.2911033 | -963.8621653 |
|                      | $Si_5^{2-}$   | $Ge_5^{2-}$    | $Sn_5^{2-}$   | $Pb_5^{2-}$  |
| Square pyramid       | -1447.3817545 | -10385.1348706 | -1071.3443037 | -963.8851717 |
| Triangular bipyramid | -1447.3816964 | -10385.1348765 | -1071.344277  | -963.8851635 |
| Flat pentagon        | -1447.3121205 | -10385.1348534 | -1071.3442936 | -963.8375353 |
|                      | $Si_5^{4-}$   | $Ge_5^{4-}$    | $Sn_5^{4-}$   | $Pb_5^{4-}$  |
| Square pyramid       | -1446.6881814 | -10384.4266891 | -1070.7848552 | -963.315488  |
| Triangular bipyramid | -1446.6881641 | -10384.4266372 | -1070.7743446 | -963.3154976 |
| Flat pentagon        | -1446.6620006 | -10384.4176391 | failed        | -963.3031012 |

**Table S2.** Electronic energies (Hartree) for optimized structures for  $E_5^n$  ( $E = Si, Ge, Sn, Pb; n = -4, -2, 0$ ) clusters from different initial structures, at BP86/def2-TZVPP level of theory.

| Initial structure    | Cluster       |                |               |              |
|----------------------|---------------|----------------|---------------|--------------|
|                      | $Si_5^-$      | $Ge_5^-$       | $Sn_5^-$      | $Pb_5^-$     |
| Square pyramid       | -1447.5894132 | -10386.4547171 | -1072.2995401 | -965.3204571 |
| Triangular bipyramid | -1447.5894190 | -10386.4547196 | -1072.2995408 | -965.3427366 |
| Flat pentagon        | -1447.5494595 | -10386.4313793 | -1072.2814731 | -965.3287632 |
|                      | $Si_5^{2-}$   | $Ge_5^{2-}$    | $Sn_5^{2-}$   | $Pb_5^{2-}$  |
| Square pyramid       | -1447.6141965 | -10386.4641576 | -1072.3384982 | -965.3758572 |
| Triangular bipyramid | -1447.6141969 | -10386.4641581 | -1072.3384672 | -965.3758572 |
| Flat pentagon        | -1447.6141971 | -10386.4176057 | -1072.2954255 | -965.3347756 |
|                      | $Si_5^{4-}$   | $Ge_5^{4-}$    | $Sn_5^{4-}$   | $Pb_5^{4-}$  |

|                      |               |                |               |              |
|----------------------|---------------|----------------|---------------|--------------|
| Square pyramid       | -1446.9366186 | -10385.7555606 | -1071.7922253 | -964.8386400 |
| Triangular bipyramid | -1446.9365943 | -10385.7555436 | -1071.7922253 | failed       |
| Flat pentagon        | -1446.9261822 | -10385.7611219 | failed        | -964.8328395 |

**Table S3.** The computed and experimental<sup>a</sup> E-E distances (Å) and E-E-E angles (°) for trigonal bipyramid  $E_5^{2-}$  ( $E = Si, Ge, Sn, Pb$ ) clusters, at M06-2X/def2-TZVPP level of theory.

|                  | $Si_5^{2-}$             | $Ge_5^{2-}$             | $Sn_5^{2-}$             | $Pb_5^{2-}$             |
|------------------|-------------------------|-------------------------|-------------------------|-------------------------|
| <i>distances</i> |                         |                         |                         |                         |
| E1-E2            | 2.36<br><b>2.39</b>     | 2.54<br><b>2.48</b>     | 2.92<br><b>2.90</b>     | 3.05<br><b>3.00</b>     |
| E1-E4            | 2.36<br><b>2.34</b>     | 2.54<br><b>2.49</b>     | 2.92<br><b>2.90</b>     | 3.05<br><b>3.00</b>     |
| E1-E5            | 2.36<br><b>2.32</b>     | 2.54<br><b>2.51</b>     | 2.92<br><b>2.90</b>     | 3.05<br><b>3.00</b>     |
| E2-E4            | 2.52<br><b>2.51</b>     | 2.72<br><b>2.70</b>     | 3.15<br><b>3.09</b>     | 3.31<br><b>3.24</b>     |
| E4-E5            | 2.52<br><b>2.54</b>     | 2.72<br><b>2.68</b>     | 3.15<br><b>3.09</b>     | 3.31<br><b>3.24</b>     |
| E2-E5            | 2.52<br><b>2.56</b>     | 2.72<br><b>2.69</b>     | 3.15<br><b>3.09</b>     | 3.31<br><b>3.24</b>     |
| E3-E2            | 2.36<br><b>2.40</b>     | 2.54<br><b>2.47</b>     | 2.92<br><b>2.83</b>     | 3.05<br><b>3.00</b>     |
| E3-E4            | 2.36<br><b>2.35</b>     | 2.54<br><b>2.47</b>     | 2.92<br><b>2.83</b>     | 3.05<br><b>3.00</b>     |
| E3-E5            | 2.36<br><b>2.28</b>     | 2.54<br><b>2.49</b>     | 2.92<br><b>2.83</b>     | 3.05<br><b>3.00</b>     |
| E3-E1            | 3.73<br><b>3.66</b>     | 3.98<br><b>3.88</b>     | 4.57<br><b>4.48</b>     | 4.76<br><b>4.70</b>     |
| <i>RMS</i>       | <i>0.04</i>             | <i>0.06</i>             | <i>0.06</i>             | <i>0.06</i>             |
| <i>Angles</i>    |                         |                         |                         |                         |
| E1-E2-E3         | 104.08<br><b>99.80</b>  | 103.40<br><b>102.66</b> | 102.95<br><b>102.83</b> | 102.54<br><b>102.99</b> |
| E1-E4-E3         | 104.07<br><b>102.73</b> | 103.35<br><b>101.91</b> | 102.91<br><b>102.84</b> | 102.57<br><b>102.99</b> |
| E1-E5-E3         | 104.07<br><b>105.52</b> | 103.31<br><b>103.26</b> | 102.91<br><b>102.84</b> | 102.57<br><b>102.99</b> |
| E5-E3-E2         | 64.39<br><b>66.25</b>   | 64.96<br><b>66.19</b>   | 65.33<br><b>64.44</b>   | 65.60<br><b>65.25</b>   |
| E5-E3-E4         | 64.36<br><b>66.51</b>   | 64.94<br><b>65.84</b>   | 65.27<br><b>64.44</b>   | 65.60<br><b>65.25</b>   |

|            |                       |                       |                       |                       |
|------------|-----------------------|-----------------------|-----------------------|-----------------------|
| E2–E3–E4   | 64.39<br><b>63.90</b> | 64.95<br><b>65.35</b> | 65.33<br><b>64.44</b> | 65.60<br><b>65.25</b> |
| E5–E1–E2   | 64.39<br><b>65.76</b> | 64.97<br><b>65.76</b> | 65.33<br><b>66.31</b> | 65.60<br><b>65.28</b> |
| E5–E1–E4   | 64.36<br><b>65.97</b> | 64.96<br><b>65.36</b> | 65.27<br><b>66.31</b> | 65.60<br><b>65.25</b> |
| E2–E1–E4   | 64.39<br><b>64.12</b> | 64.96<br><b>64.81</b> | 65.33<br><b>66.31</b> | 65.60<br><b>65.25</b> |
| E4–E5–E2   | 60.02<br><b>59.05</b> | 59.98<br><b>59.59</b> | 60.03<br><b>60.00</b> | 60.00<br><b>60.00</b> |
| E5–E2–E4   | 59.97<br><b>60.07</b> | 60.01<br><b>60.08</b> | 59.95<br><b>60.00</b> | 60.00<br><b>60.00</b> |
| E2–E4–E5   | 60.01<br><b>60.87</b> | 60.01<br><b>60.32</b> | 60.03<br><b>60.00</b> | 60.00<br><b>60.00</b> |
| <i>RMS</i> | <i>1.75</i>           | <i>0.51</i>           | <i>0.66</i>           | <i>0.33</i>           |

<sup>a</sup> The experimental data are given in bold.

**Table S4.** The computed and experimental<sup>a</sup> E–E distances (Å) and E–E–E angles (°) for trigonal bipyramid  $E_5^{2-}$  ( $E = Si, Ge, Sn, Pb$ ) clusters, at BP86/def2-TZVPP level of theory.

|                  | $Si_5^{2-}$             | $Ge_5^{2-}$             | $Sn_5^{2-}$             | $Pb_5^{2-}$             |
|------------------|-------------------------|-------------------------|-------------------------|-------------------------|
| <i>distances</i> |                         |                         |                         |                         |
| E1–E2            | 2.40<br><b>2.39</b>     | 2.56<br><b>2.48</b>     | 2.95<br><b>2.90</b>     | 3.09<br><b>3.00</b>     |
| E1–E4            | 2.40<br><b>2.34</b>     | 2.56<br><b>2.49</b>     | 2.95<br><b>2.90</b>     | 3.10<br><b>3.00</b>     |
| E1–E5            | 2.40<br><b>2.32</b>     | 2.56<br><b>2.51</b>     | 2.95<br><b>2.90</b>     | 3.09<br><b>3.00</b>     |
| E2–E4            | 2.57<br><b>2.51</b>     | 2.76<br><b>2.70</b>     | 3.16<br><b>3.09</b>     | 3.30<br><b>3.24</b>     |
| E4–E5            | 2.57<br><b>2.54</b>     | 2.76<br><b>2.68</b>     | 3.17<br><b>3.09</b>     | 3.31<br><b>3.24</b>     |
| E2–E5            | 2.57<br><b>2.56</b>     | 2.76<br><b>2.69</b>     | 3.16<br><b>3.09</b>     | 3.30<br><b>3.24</b>     |
| E3–E2            | 2.40<br><b>2.40</b>     | 2.56<br><b>2.47</b>     | 2.95<br><b>2.83</b>     | 3.09<br><b>3.00</b>     |
| E3–E4            | 2.40<br><b>2.35</b>     | 2.56<br><b>2.47</b>     | 2.95<br><b>2.83</b>     | 3.09<br><b>3.00</b>     |
| E3–E5            | 2.40<br><b>2.28</b>     | 2.56<br><b>2.49</b>     | 2.95<br><b>2.83</b>     | 3.09<br><b>3.00</b>     |
| E3–E1            | 3.76<br><b>3.66</b>     | 4.00<br><b>3.88</b>     | 4.62<br><b>4.48</b>     | 4.87<br><b>4.70</b>     |
| <i>RMS</i>       | <i>0.06</i>             | <i>0.08</i>             | <i>0.09</i>             | <i>0.09</i>             |
| <i>Angles</i>    |                         |                         |                         |                         |
| E1–E2–E3         | 103.51<br><b>99.80</b>  | 102.82<br><b>102.66</b> | 103.35<br><b>102.83</b> | 103.89<br><b>102.99</b> |
| E1–E4–E3         | 103.51<br><b>102.73</b> | 102.87<br><b>101.91</b> | 103.26<br><b>102.84</b> | 103.79<br><b>102.99</b> |
| E1–E5–E3         | 103.56<br><b>105.52</b> | 102.91<br><b>103.26</b> | 103.31<br><b>102.84</b> | 103.90<br><b>102.99</b> |
| E5–E3–E2         | 64.82<br><b>66.25</b>   | 65.35<br><b>66.19</b>   | 65.15<br><b>64.44</b>   | 64.44<br><b>65.25</b>   |
| E5–E3–E4         | 64.82                   | 65.33                   | 64.97                   | 64.64                   |

|            |              |              |              |              |
|------------|--------------|--------------|--------------|--------------|
|            | <b>66.51</b> | <b>65.84</b> | <b>64.44</b> | <b>65.25</b> |
| E2–E3–E4   | 64.81        | 65.35        | 64.14        | 64.42        |
|            | <b>63.90</b> | <b>65.35</b> | <b>64.44</b> | <b>65.25</b> |
| E5–E1–E2   | 64.82        | 65.35        | 64.93        | 64.52        |
|            | <b>65.76</b> | <b>65.76</b> | <b>66.31</b> | <b>65.28</b> |
| E5–E1–E4   | 64.82        | 65.36        | 65.08        | 64.74        |
|            | <b>65.97</b> | <b>65.36</b> | <b>66.31</b> | <b>65.25</b> |
| E2–E1–E4   | 64.84        | 65.39        | 64.89        | 64.53        |
|            | <b>64.12</b> | <b>64.81</b> | <b>66.31</b> | <b>65.25</b> |
| E4–E5–E2   | 59.98        | 60.00        | 59.91        | 59.91        |
|            | <b>59.05</b> | <b>59.59</b> | <b>60.00</b> | <b>60.00</b> |
| E5–E2–E4   | 60.00        | 60.00        | 60.13        | 60.18        |
|            | <b>60.07</b> | <b>60.08</b> | <b>60.00</b> | <b>60.00</b> |
| E2–E4–E5   | 60.00        | 60.00        | 59.95        | 59.92        |
|            | <b>60.87</b> | <b>60.32</b> | <b>60.00</b> | <b>60.00</b> |
| <i>RMS</i> | <i>1.53</i>  | <i>0.50</i>  | <i>0.80</i>  | <i>0.70</i>  |

<sup>a</sup> The experimental data are given in bold.

**Table S5.** Computed<sup>a</sup> and experimental structural parameters for  $[Pb_5\{Mo(CO)_3\}_2]^{4-}$ .

| Distance    | BP86        | M06-2X      | Exp.  |
|-------------|-------------|-------------|-------|
| Pb1–Pb2     | 3.11        | 3.10        | 3.02  |
| Pb2–Pb3     | 3.13        | 3.10        | 3.06  |
| Pb3–Pb4     | 3.13        | 3.09        | 3.06  |
| Pb4–Pb5     | 3.13        | 3.09        | 3.05  |
| Pb5–Pb1     | 3.13        | 3.10        | 3.01  |
| Mo1–Mo2     | 3.33        | 3.33        | 3.22  |
| Mo1–C1      | 1.95        | 1.92        | 1.93  |
| Mo1–C2      | 1.95        | 1.92        | 1.92  |
| Mo1–C3      | 1.95        | 1.92        | 1.96  |
| Mo2–C4      | 1.95        | 1.92        | 1.92  |
| Mo2–C5      | 1.95        | 1.92        | 1.93  |
| Mo2–C6      | 1.95        | 1.92        | 1.93  |
| <i>RMS</i>  | <i>0.07</i> | <i>0.05</i> | –     |
| C1–Mo1–C2   | 87.86       | 88.20       | 93.64 |
| C1–Mo1–C3   | 86.92       | 87.36       | 89.23 |
| C2–Mo1–C3   | 89.85       | 89.84       | 93.69 |
| C4–Mo2–C5   | 86.91       | 87.36       | 87.56 |
| C4–Mo2–C6   | 89.85       | 89.83       | 87.47 |
| C5–Mo–C6    | 89.85       | 88.21       | 92.68 |
| <i>RMS</i>  | <i>3.36</i> | <i>3.50</i> | –     |
| Mo1–Pb1–Mo2 | 64.33       | 63.24       | 63.43 |
| Mo1–Pb2–Mo2 | 64.33       | 63.32       | 63.96 |
| Mo1–Pb3–Mo2 | 63.55       | 63.04       | 63.63 |
| Mo1–Pb4–Mo2 | 65.01       | 63.34       | 63.96 |
| Mo1–Pb5–Mo2 | 63.55       | 63.05       | 63.67 |
| <i>RMS</i>  | <i>0.64</i> | <i>0.56</i> | –     |

<sup>a</sup> The data obtained at BP86/def2-TZVPP and M06-2X/def2-TZVPP levels of theory.

**Table S6.** Computed bond lengths (Å) for  $[E_5\{Cr(CO)_3\}_2]^{4-}$  complexes (E=Si, Ge, Sn and Pb), at M06-2X/def2-TZVPP level of theory.

| Bond lengths | $[Si_5\{Cr(CO)_3\}_2]^{4-}$ | $[Ge_5\{Cr(CO)_3\}_2]^{4-}$ | $[Sn_5\{Cr(CO)_3\}_2]^{4-}$ | $[Pb_5\{Cr(CO)_3\}_2]^{4-}$ |
|--------------|-----------------------------|-----------------------------|-----------------------------|-----------------------------|
| Cr1-E1       | 2.58                        | 2.69                        | 2.96                        | 3.09                        |
| Cr1-E2       | 2.60                        | 2.69                        | 2.92                        | 3.01                        |
| Cr1-E3       | 2.59                        | 2.70                        | 2.95                        | 3.06                        |
| Cr1-E4       | 2.58                        | 2.70                        | 2.95                        | 3.06                        |
| Cr1-E5       | 2.61                        | 2.69                        | 2.93                        | 3.01                        |
| Cr2-E1       | 2.60                        | 2.70                        | 2.92                        | 3.00                        |
| Cr2-E2       | 2.59                        | 2.70                        | 2.96                        | 3.07                        |
| Cr2-E3       | 2.59                        | 2.70                        | 2.94                        | 3.04                        |
| Cr2-E4       | 2.60                        | 2.70                        | 2.93                        | 3.03                        |
| Cr2-E5       | 2.57                        | 2.70                        | 2.96                        | 3.09                        |
| E1-E2        | 2.51                        | 2.63                        | 2.94                        | 3.06                        |
| E2-E3        | 2.51                        | 2.63                        | 2.94                        | 3.05                        |
| E3-E4        | 2.52                        | 2.64                        | 2.94                        | 3.06                        |
| E4-E5        | 2.52                        | 2.64                        | 2.94                        | 3.06                        |
| E5-E1        | 2.93                        | 3.00                        | 3.10                        | 3.17                        |

**Table S7.** Computed bond lengths (Å) for  $[E_5\{Mo(CO)_3\}_2]^{4-}$  complexes (E=Si, Ge, Sn and Pb), at M06-2X/def2-TZVPP level of theory.

| Bond lengths | $[Si_5\{Mo(CO)_3\}_2]^{4-}$ | $[Ge_5\{Mo(CO)_3\}_2]^{4-}$ | $[Sn_5\{Mo(CO)_3\}_2]^{4-}$ | $[Pb_5\{Mo(CO)_3\}_2]^{4-}$ |
|--------------|-----------------------------|-----------------------------|-----------------------------|-----------------------------|
| Mo1-E1       | 2.70                        | 2.80                        | 3.04                        | 3.14                        |
| Mo1-E2       | 2.72                        | 2.81                        | 3.03                        | 3.13                        |
| Mo1-E3       | 2.72                        | 2.81                        | 3.06                        | 3.17                        |
| Mo1-E4       | 2.71                        | 2.81                        | 3.03                        | 3.10                        |
| Mo1-E5       | 2.73                        | 2.81                        | 3.06                        | 3.16                        |
| Mo2-E1       | 2.73                        | 2.82                        | 3.03                        | 3.13                        |
| Mo2-E2       | 2.71                        | 2.81                        | 3.04                        | 3.14                        |
| Mo2-E3       | 2.71                        | 2.81                        | 3.06                        | 3.16                        |
| Mo2-E4       | 2.72                        | 2.81                        | 3.03                        | 3.10                        |
| Mo2-E5       | 2.69                        | 2.80                        | 3.06                        | 3.17                        |
| E1-E2        | 2.58                        | 2.70                        | 3.02                        | 3.13                        |
| E2-E3        | 2.58                        | 2.70                        | 3.01                        | 3.13                        |
| E3-E4        | 2.58                        | 2.70                        | 3.01                        | 3.13                        |
| E4-E5        | 2.59                        | 2.71                        | 3.02                        | 3.13                        |
| E5-E1        | 3.19                        | 3.23                        | 3.28                        | 3.33                        |

**Table S8.** Computed bond lengths (Å) for  $[E_5\{W(CO)_3\}_2]^{4-}$  complexes (E=Si, Ge, Sn and Pb), at M06-2X/def2-TZVPP level of theory.

| Bond lengths | $[Si_5\{W(CO)_3\}_2]^{4-}$ | $[Ge_5\{W(CO)_3\}_2]^{4-}$ | $[Sn_5\{W(CO)_3\}_2]^{4-}$ | $[Pb_5\{W(CO)_3\}_2]^{4-}$ |
|--------------|----------------------------|----------------------------|----------------------------|----------------------------|
| Mo1-E1       | 2.71                       | 2.81                       | 3.05                       | 3.15                       |
| Mo1-E2       | 2.74                       | 2.83                       | 3.04                       | 3.13                       |
| Mo1-E3       | 2.73                       | 2.83                       | 3.07                       | 3.18                       |
| Mo1-E4       | 2.72                       | 2.83                       | 3.03                       | 3.11                       |
| Mo1-E5       | 2.74                       | 2.83                       | 3.07                       | 3.17                       |
| Mo2-E1       | 2.75                       | 2.83                       | 3.04                       | 3.13                       |
| Mo2-E2       | 2.72                       | 2.82                       | 3.05                       | 3.15                       |



|        |      |      |      |      |
|--------|------|------|------|------|
| Mo2-E3 | 2.73 | 2.83 | 3.07 | 3.17 |
| Mo2-E4 | 2.74 | 2.83 | 3.03 | 3.11 |
| Mo2-E5 | 2.71 | 2.82 | 3.07 | 3.18 |
| E1-E2  | 2.58 | 2.71 | 3.03 | 3.14 |
| E2-E3  | 2.58 | 2.70 | 3.02 | 3.14 |
| E3-E4  | 2.59 | 2.71 | 3.02 | 3.14 |
| E4-E5  | 2.60 | 2.72 | 3.03 | 3.14 |
| E5-E1  | 3.22 | 3.25 | 3.29 | 3.34 |

**Table S9.** Calculated values of uncorrected interaction energies between the fragments (IE, kcal/mol), for  $[E_5\{M(CO)_3\}_2]^{4-}$ ; (E=Si, Ge, Sn and Pb; M=Cr, Mo and W) complexes, at M06-2X/def2-TZVPP level of theory.

| Complex                     | IE <sub>AB-A'</sub> | IE <sub>A-BA'</sub> | IE <sub>A-B</sub> | IE <sub>B-A'</sub> | IE <sub>total</sub> |         |
|-----------------------------|---------------------|---------------------|-------------------|--------------------|---------------------|---------|
|                             |                     |                     |                   |                    | (Eq. 6)             | (Eq. 7) |
| $[Si_5\{Cr(CO)_3\}_2]^{4-}$ | -209.7              | -209.9              | -196.4            | -196.4             | -406.1              | -406.1  |
| $[Ge_5\{Cr(CO)_3\}_2]^{4-}$ | -208.4              | -208.4              | -186.5            | -186.5             | -394.9              | -394.9  |
| $[Sn_5\{Cr(CO)_3\}_2]^{4-}$ | -174.6              | -174.6              | -125.5            | -125.5             | -300.1              | -300.1  |
| $[Pb_5\{Cr(CO)_3\}_2]^{4-}$ | -157.3              | -157.9              | -124.7            | -124.0             | -281.9              | -281.9  |
| $[Si_5\{Mo(CO)_3\}_2]^{4-}$ | -214.0              | -213.9              | -199.7            | -199.8             | -413.7              | -413.7  |
| $[Ge_5\{Mo(CO)_3\}_2]^{4-}$ | -214.1              | -214.1              | -206.2            | -206.3             | -420.4              | -420.4  |
| $[Sn_5\{Mo(CO)_3\}_2]^{4-}$ | -188.2              | -188.0              | -139.6            | -139.7             | -327.7              | -327.7  |
| $[Pb_5\{Mo(CO)_3\}_2]^{4-}$ | -173.8              | -174.4              | -137.5            | -136.9             | -311.3              | -311.3  |
| $[Si_5\{W(CO)_3\}_2]^{4-}$  | -233.0              | -232.9              | -218.4            | -218.5             | -451.4              | -451.4  |
| $[Ge_5\{W(CO)_3\}_2]^{4-}$  | -233.5              | -233.3              | -221.9            | -222.1             | -455.4              | -455.4  |
| $[Sn_5\{W(CO)_3\}_2]^{4-}$  | -204.7              | -204.9              | -156.3            | -156.1             | -361.0              | -361.0  |
| $[Pb_5\{W(CO)_3\}_2]^{4-}$  | -197.2              | -197.2              | -161.7            | -161.8             | -358.9              | -358.9  |

**Table S10.** Calculated values of uncorrected interaction energies between the fragments (IE, kcal/mol), for  $[E_5\{M(CO)_3\}_2]^{4-}$ ; (E = Si, Ge, Sn and Pb; M = Cr, Mo and W) complexes, at BP86/def2-TZVPP level of theory.

| Complex                     | IE <sub>AB-A'</sub> | IE <sub>A-BA'</sub> | IE <sub>A-B</sub> | IE <sub>B-A'</sub> | IE <sub>total</sub> |         |
|-----------------------------|---------------------|---------------------|-------------------|--------------------|---------------------|---------|
|                             |                     |                     |                   |                    | (Eq. 6)             | (Eq. 7) |
| $[Si_5\{Cr(CO)_3\}_2]^{4-}$ | -238.8              | -254.2              | -178.9            | -163.5             | -417.7              | -417.7  |
| $[Ge_5\{Cr(CO)_3\}_2]^{4-}$ | -254.9              | -252.9              | -170.8            | -172.7             | -425.7              | -425.7  |
| $[Sn_5\{Cr(CO)_3\}_2]^{4-}$ | -193.8              | -196.8              | -131.8            | -128.7             | -325.5              | -325.5  |

|                             |        |        |        |        |        |        |
|-----------------------------|--------|--------|--------|--------|--------|--------|
| $[Pb_5\{Cr(CO)_3\}_2]^{4-}$ | -179.7 | -189.8 | -127.3 | -117.1 | -306.9 | -306.9 |
| $[Si_5\{Mo(CO)_3\}_2]^{4-}$ | -229.4 | -230.6 | -189.7 | -188.4 | -419.0 | -419.0 |
| $[Ge_5\{Mo(CO)_3\}_2]^{4-}$ | -239.8 | -234.5 | -189.9 | -195.1 | -429.7 | -429.7 |
| $[Sn_5\{Mo(CO)_3\}_2]^{4-}$ | -200.4 | -196.5 | -127.9 | -131.8 | -328.3 | -328.3 |
| $[Pb_5\{Mo(CO)_3\}_2]^{4-}$ | -187.0 | -192.3 | -127.8 | -122.6 | -314.9 | -314.9 |
| $[Si_5\{W(CO)_3\}_2]^{4-}$  | -247.8 | -241.7 | -200.3 | -206.4 | -448.1 | -448.1 |
| $[Ge_5\{W(CO)_3\}_2]^{4-}$  | -245.3 | -243.0 | -211.9 | -214.2 | -457.2 | -457.2 |
| $[Sn_5\{W(CO)_3\}_2]^{4-}$  | -210.7 | -213.4 | -146.3 | -143.5 | -357.0 | -357.0 |
| $[Pb_5\{W(CO)_3\}_2]^{4-}$  | -199.8 | -206.1 | -140.8 | -134.5 | -340.6 | -340.6 |

**Table S11.** Calculated values of corrected interaction energies between the fragments (IE, kcal/mol), for  $[E_5\{M(CO)_3\}_2]^{4-}$ ; (E = Si, Ge, Sn and Pb; M = Cr, Mo and W) complexes, at BP86/def2-TZVPP level of theory.

| Complex                     | IE <sub>AB-A'</sub> | IE <sub>A-BA'</sub> | IE <sub>A-B</sub> | IE <sub>B-A'</sub> | IE <sub>total</sub><br>(Eq. 6) | (Eq. 7) |
|-----------------------------|---------------------|---------------------|-------------------|--------------------|--------------------------------|---------|
| $[Si_5\{Cr(CO)_3\}_2]^{4-}$ | -195.8              | -241.9              | -148.3            | -136.4             | -372.1                         | -372.1  |
| $[Ge_5\{Cr(CO)_3\}_2]^{4-}$ | -196.8              | -198.7              | -134.5            | -130.7             | -362.1                         | -362.1  |
| $[Sn_5\{Cr(CO)_3\}_2]^{4-}$ | -179.7              | -186.7              | -114.6            | -123.1             | -305.9                         | -305.9  |
| $[Pb_5\{Cr(CO)_3\}_2]^{4-}$ | -162.1              | -173.4              | -103.0            | -104.7             | -289.3                         | -289.3  |
| $[Si_5\{Mo(CO)_3\}_2]^{4-}$ | -198.4              | -209.4              | -145.8            | -147.0             | -355.3                         | -355.3  |
| $[Ge_5\{Mo(CO)_3\}_2]^{4-}$ | -211.6              | -203.2              | -135.3            | -140.7             | -345.9                         | -345.9  |
| $[Sn_5\{Mo(CO)_3\}_2]^{4-}$ | -176.8              | -179.2              | -115.5            | -119.4             | -314.1                         | -314.1  |
| $[Pb_5\{Mo(CO)_3\}_2]^{4-}$ | -161.8              | -166.9              | -118.1            | -110.4             | -297.3                         | -297.3  |
| $[Si_5\{W(CO)_3\}_2]^{4-}$  | -232.6              | -230.5              | -171.6            | -177.5             | -411.5                         | -411.5  |
| $[Ge_5\{W(CO)_3\}_2]^{4-}$  | -223.5              | -215.3              | -178.0            | -181.2             | -402.4                         | -402.4  |
| $[Sn_5\{W(CO)_3\}_2]^{4-}$  | -209.5              | -212.1              | -139.4            | -127.3             | -340.7                         | -340.7  |
| $[Pb_5\{W(CO)_3\}_2]^{4-}$  | -191.7              | -205.9              | -129.4            | -123.9             | -326.8                         | -326.8  |

**Table S12.** Wiberg bond indices (WBIs) for  $[E_5\{Cr(CO)_3\}_2]^{4-}$  at M06-2X/def2-TZVPP level of theory.

| Bond   | $[Si_5\{Cr(CO)_3\}_2]^{4-}$ | $[Ge_5\{Cr(CO)_3\}_2]^{4-}$ | $[Sn\{Cr(CO)_3\}_2]^{4-}$ | $[Pb_5\{Cr(CO)_3\}_2]^{4-}$ |
|--------|-----------------------------|-----------------------------|---------------------------|-----------------------------|
| Cr1-E1 | 0.47                        | 0.47                        | 0.42                      | 0.39                        |
| Cr1-E2 | 0.44                        | 0.45                        | 0.46                      | 0.48                        |
| Cr1-E3 | 0.45                        | 0.46                        | 0.44                      | 0.43                        |
| Cr1-E4 | 0.46                        | 0.46                        | 0.43                      | 0.42                        |
| Cr1-E5 | 0.43                        | 0.45                        | 0.47                      | 0.48                        |
| Cr2-E1 | 0.43                        | 0.45                        | 0.47                      | 0.49                        |
| Cr2-E2 | 0.46                        | 0.46                        | 0.43                      | 0.40                        |
| Cr2-E3 | 0.45                        | 0.46                        | 0.45                      | 0.46                        |
| Cr2-E4 | 0.44                        | 0.45                        | 0.45                      | 0.46                        |
| Cr2-E5 | 0.43                        | 0.47                        | 0.43                      | 0.40                        |
| E1-E2  | 0.61                        | 0.61                        | 0.62                      | 0.63                        |
| E2-E3  | 0.62                        | 0.62                        | 0.62                      | 0.62                        |
| E3-E4  | 0.62                        | 0.62                        | 0.62                      | 0.63                        |
| E4-E5  | 0.61                        | 0.61                        | 0.62                      | 0.63                        |
| E5-E1  | 0.60                        | 0.61                        | 0.61                      | 0.62                        |

**Table S13.** Wiberg bond indices (WBIs) for  $[E_5\{Mo(CO)_3\}_2]^{4-}$  at M06-2X/def2-TZVPP level of theory.

| Bond   | $[Si_5\{Mo(CO)_3\}_2]^{4-}$ | $[Ge_5\{Mo(CO)_3\}_2]^{4-}$ | $[Sn\{Mo(CO)_3\}_2]^{4-}$ | $[Pb_5\{Mo(CO)_3\}_2]^{4-}$ |
|--------|-----------------------------|-----------------------------|---------------------------|-----------------------------|
| Mo1-E1 | 0.51                        | 0.50                        | 0.45                      | 0.43                        |
| Mo1-E2 | 0.47                        | 0.48                        | 0.46                      | 0.46                        |
| Mo1-E3 | 0.48                        | 0.48                        | 0.46                      | 0.44                        |
| Mo1-E4 | 0.48                        | 0.48                        | 0.45                      | 0.45                        |
| Mo1-E5 | 0.46                        | 0.48                        | 0.47                      | 0.46                        |
| Mo2-E1 | 0.46                        | 0.47                        | 0.47                      | 0.46                        |
| Mo2-E2 | 0.49                        | 0.49                        | 0.45                      | 0.43                        |
| Mo2-E3 | 0.48                        | 0.48                        | 0.46                      | 0.46                        |
| Mo2-E4 | 0.48                        | 0.48                        | 0.46                      | 0.45                        |
| Mo2-E5 | 0.50                        | 0.49                        | 0.46                      | 0.44                        |
| E1-E2  | 0.57                        | 0.59                        | 0.61                      | 0.62                        |
| E2-E3  | 0.59                        | 0.60                        | 0.61                      | 0.62                        |
| E3-E4  | 0.59                        | 0.60                        | 0.61                      | 0.63                        |
| E4-E5  | 0.58                        | 0.59                        | 0.62                      | 0.63                        |
| E5-E1  | 0.57                        | 0.58                        | 0.60                      | 0.62                        |

**Table S14.** Wiberg bond indices (WBIs) for  $[E_5\{Cr(CO)_3\}_2]^{4-}$  at M06-2X/def2-TZVPP level of theory.

| Bond  | $[Si_5\{W(CO)_3\}_2]^{4-}$ | $[Ge_5\{W(CO)_3\}_2]^{4-}$ | $[Sn\{W(CO)_3\}_2]^{4-}$ | $[Pb_5\{W(CO)_3\}_2]^{4-}$ |
|-------|----------------------------|----------------------------|--------------------------|----------------------------|
| W1-E1 | 0.53                       | 0.52                       | 0.47                     | 0.45                       |
| W1-E2 | 0.49                       | 0.49                       | 0.48                     | 0.47                       |
| W1-E3 | 0.49                       | 0.49                       | 0.47                     | 0.46                       |
| W1-E4 | 0.50                       | 0.50                       | 0.47                     | 0.46                       |
| W1-E5 | 0.48                       | 0.48                       | 0.48                     | 0.47                       |
| W2-E1 | 0.47                       | 0.48                       | 0.47                     | 0.47                       |
| W2-E2 | 0.51                       | 0.51                       | 0.47                     | 0.45                       |
| W2-E3 | 0.49                       | 0.49                       | 0.48                     | 0.47                       |
| W2-E4 | 0.49                       | 0.49                       | 0.47                     | 0.46                       |
| W2-E5 | 0.52                       | 0.51                       | 0.47                     | 0.46                       |
| E1-E2 | 0.57                       | 0.57                       | 0.58                     | 0.60                       |
| E2-E3 | 0.58                       | 0.58                       | 0.58                     | 0.58                       |
| E3-E4 | 0.59                       | 0.59                       | 0.58                     | 0.59                       |
| E4-E5 | 0.58                       | 0.58                       | 0.58                     | 0.59                       |
| E5-E1 | 0.56                       | 0.56                       | 0.57                     | 0.58                       |

**Table S15.** Calculated frequencies ( $\text{cm}^{-1}$ )<sup>a</sup> for CO stretching bands in  $[E_5\{Cr(CO)_3\}_2]^{4-}$  complexes as well as bond lengths (Å) and Wiberg bond indices (WBIs) for M-C and C-O bonds.

| Complex                     | $\bar{\nu}_{C=O}$ | WBI    |      |        |      | Distance(Å) |       |        |       |
|-----------------------------|-------------------|--------|------|--------|------|-------------|-------|--------|-------|
| $[Si_5\{Cr(CO)_3\}_2]^{4-}$ | 1661.95           | Cr1-C1 | 1.31 | Cr2-C4 | 1.31 | Cr1-C1      | 1.792 | Cr2-C4 | 1.792 |
|                             | 1667.15           | Cr1-C2 | 1.32 | Cr2-C5 | 1.32 | Cr1-C2      | 1.788 | Cr2-C5 | 1.788 |
|                             |                   | Cr1-C3 | 1.30 | Cr2-C6 | 1.30 | Cr1-C3      | 1.793 | Cr2-C6 | 1.793 |
|                             |                   | C1-O1  | 1.81 | C4-O4  | 1.81 | C1-O1       | 1.183 | C4-O4  | 1.183 |
|                             |                   | C2-O2  | 1.80 | C5-O5  | 1.80 | C2-O2       | 1.184 | C5-O5  | 1.184 |
|                             | 1734.89           | C3-O3  | 1.82 | C6-O6  | 1.82 | C3-O3       | 1.182 | C6-O6  | 1.182 |
| $[Ge_5\{Cr(CO)_3\}_2]^{4-}$ | 1656.68           | Cr1-C1 | 1.33 | Cr2-C4 | 1.32 | Cr1-C1      | 1.788 | Cr2-C4 | 1.789 |
|                             | 1664.07           | Cr1-C2 | 1.34 | Cr2-C5 | 1.34 | Cr1-C2      | 1.786 | Cr2-C5 | 1.785 |
|                             |                   | Cr1-C3 | 1.31 | Cr2-C6 | 1.32 | Cr1-C3      | 1.790 | Cr2-C6 | 1.790 |
|                             |                   | C1-O1  | 1.80 | C4-O4  | 1.80 | C1-O1       | 1.184 | C4-O4  | 1.183 |
|                             |                   | C2-O2  | 1.80 | C5-O5  | 1.79 | C2-O2       | 1.184 | C5-O5  | 1.184 |
|                             | 1732.73           | C3-O3  | 1.81 | C6-O6  | 1.81 | C3-O3       | 1.182 | C6-O6  | 1.183 |
| $[Sn_5\{Cr(CO)_3\}_2]^{4-}$ | 1663.21           | Cr1-C1 | 1.36 | Cr2-C4 | 1.36 | Cr1-C1      | 1.787 | Cr2-C4 | 1.789 |
|                             | 1672.38           | Cr1-C2 | 1.37 | Cr2-C5 | 1.37 | Cr1-C2      | 1.786 | Cr2-C5 | 1.785 |
|                             |                   | Cr1-C3 | 1.35 | Cr2-C6 | 1.35 | Cr1-C3      | 1.790 | Cr2-C6 | 1.790 |

|                             |         |        |      |        |      |        |       |        |       |
|-----------------------------|---------|--------|------|--------|------|--------|-------|--------|-------|
| $[Pb_5\{Cr(CO)_3\}_2]^{4-}$ | 1734.48 | C1–O1  | 1.80 | C4–O4  | 1.81 | C1–O1  | 1.182 | C4–O4  | 1.181 |
|                             |         | C2–O2  | 1.79 | C5–O5  | 1.79 | C2–O2  | 1.182 | C5–O5  | 1.183 |
|                             |         | C3–O3  | 1.81 | C6–O6  | 1.81 | C3–O3  | 1.180 | C6–O6  | 1.180 |
|                             | 1640.40 | Cr1–C1 | 1.38 | Cr2–C4 | 1.37 | Cr1–C1 | 1.784 | Cr2–C4 | 1.786 |
|                             |         | Cr1–C2 | 1.39 | Cr2–C5 | 1.39 | Cr1–C2 | 1.783 | Cr2–C5 | 1.782 |
|                             | 1652.32 | Cr1–C3 | 1.37 | Cr2–C6 | 1.38 | Cr1–C3 | 1.787 | Cr2–C6 | 1.785 |
|                             |         | C1–O1  | 1.78 | C4–O4  | 1.79 | C1–O1  | 1.185 | C4–O4  | 1.183 |
|                             | 1716.33 | C2–O2  | 1.78 | C5–O5  | 1.77 | C2–O2  | 1.185 | C5–O5  | 1.186 |
|                             |         | C3–O3  | 1.80 | C6–O6  | 1.79 | C3–O3  | 1.182 | C6–O6  | 1.183 |

<sup>a</sup> The scaling factor  $\lambda=0.9323$  was used at M06-2X/def2-TZVPP level of theory.

**Table S16.** Calculated frequencies ( $\text{cm}^{-1}$ )<sup>a</sup> for CO stretching bands in  $[E_5\{Mo(CO)_3\}_2]^{4-}$  complexes as well as bond lengths (Å) and Wiberg bond indices (WBIs) for M-C and C-O bonds.

| Complex                     | $\bar{\nu}_{C=O}$ | WBI    |      |        |      | Distance(Å) |       |        |       |
|-----------------------------|-------------------|--------|------|--------|------|-------------|-------|--------|-------|
| $[Si_5\{Mo(CO)_3\}_2]^{4-}$ | 1691.30           | Mo1–C1 | 1.34 | Mo2–C4 | 1.33 | Mo1–C1      | 1.946 | Mo2–C4 | 1.948 |
|                             |                   | Mo1–C2 | 1.36 | Mo2–C5 | 1.36 | Mo1–C2      | 1.944 | Mo2–C5 | 1.942 |
|                             | 1699.1            | Mo1–C3 | 1.32 | Mo2–C6 | 1.32 | Mo1–C3      | 1.948 | Mo2–C6 | 1.948 |
|                             |                   | C1–O1  | 1.82 | C4–O4  | 1.83 | C1–O1       | 1.177 | C4–O4  | 1.176 |
|                             | 1771.38           | C2–O2  | 1.82 | C5–O5  | 1.81 | C2–O2       | 1.179 | C5–O5  | 1.179 |
|                             |                   | C3–O3  | 1.84 | C6–O6  | 1.84 | C3–O3       | 1.175 | C6–O6  | 1.176 |
| $[Ge_5\{Mo(CO)_3\}_2]^{4-}$ | 1686.66           | Mo1–C1 | 1.37 | Mo2–C4 | 1.36 | Mo1–C1      | 1.938 | Mo2–C4 | 1.939 |
|                             |                   | Mo1–C2 | 1.38 | Mo2–C5 | 1.39 | Mo1–C2      | 1.936 | Mo2–C5 | 1.934 |
|                             | 1696.01           | Mo1–C3 | 1.35 | Mo2–C6 | 1.36 | Mo1–C3      | 1.939 | Mo2–C6 | 1.939 |
|                             |                   | C1–O1  | 1.82 | C4–O4  | 1.83 | C1–O1       | 1.178 | C4–O4  | 1.177 |
|                             | 1770.38           | C2–O2  | 1.81 | C5–O5  | 1.81 | C2–O2       | 1.179 | C5–O5  | 1.180 |
|                             |                   | C3–O3  | 1.83 | C6–O6  | 1.83 | C3–O3       | 1.176 | C6–O6  | 1.177 |
| $[Sn_5\{Mo(CO)_3\}_2]^{4-}$ | 1691.49           | Mo1–C1 | 1.40 | Mo2–C4 | 1.40 | Mo1–C1      | 1.930 | Mo2–C4 | 1.930 |
|                             |                   | Mo1–C2 | 1.43 | Mo2–C5 | 1.42 | Mo1–C2      | 1.927 | Mo2–C5 | 1.928 |

|                             |         |        |      |        |      |        |       |        |       |
|-----------------------------|---------|--------|------|--------|------|--------|-------|--------|-------|
| $[Pb_5\{Mo(CO)_3\}_2]^{4-}$ | 1701.74 | Mo1-C3 | 1.40 | Mo2-C6 | 1.41 | Mo1-C3 | 1.930 | Mo2-C6 | 1.929 |
|                             |         | C1-O1  | 1.83 | C4-O4  | 1.83 | C1-O1  | 1.176 | C4-O4  | 1.176 |
|                             | 1773.98 | C2-O2  | 1.81 | C5-O5  | 1.81 | C2-O2  | 1.179 | C5-O5  | 1.178 |
|                             |         | C3-O3  | 1.82 | C6-O6  | 1.82 | C3-O3  | 1.176 | C6-O6  | 1.177 |
|                             | 1668.65 | Mo1-C1 | 1.45 | Mo2-C4 | 1.43 | Mo1-C1 | 1.920 | Mo2-C4 | 1.921 |
|                             |         | Mo1-C2 | 1.45 | Mo2-C5 | 1.45 | Mo1-C2 | 1.920 | Mo2-C5 | 1.919 |
|                             | 1681.00 | Mo1-C3 | 1.43 | Mo2-C6 | 1.44 | Mo1-C3 | 1.920 | Mo2-C6 | 1.920 |
|                             |         | C1-O1  | 1.79 | C4-O4  | 1.81 | C1-O1  | 1.182 | C4-O4  | 1.179 |
|                             | 1758.11 | C2-O2  | 1.79 | C5-O5  | 1.79 | C2-O2  | 1.181 | C5-O5  | 1.182 |
|                             |         | C3-O3  | 1.81 | C6-O6  | 1.80 | C3-O3  | 1.179 | C6-O6  | 1.180 |

<sup>a</sup> The scaling factor  $\lambda=0.9323$  was used at M06-2X/def2-TZVPP level of theory.

**Table S17.** Calculated frequencies ( $\text{cm}^{-1}$ )<sup>a</sup> for CO stretching bands in  $[E_5\{W(CO)_3\}_2]^{4-}$  complexes as well as bond lengths ( $\text{\AA}$ ) and Wiberg bond indices (WBIs) for M-C and C-O bonds.

| Complex                    | $\bar{\nu}_{C=O}$ | WBI   |      |        |      | Distance( $\text{\AA}$ ) |       |        |       |
|----------------------------|-------------------|-------|------|--------|------|--------------------------|-------|--------|-------|
| $[Si_5\{W(CO)_3\}_2]^{4-}$ | 1690.99           | W1-C1 | 1.32 | W 2-C4 | 1.31 | W1-C1                    | 1.966 | W 2-C4 | 1.968 |
|                            |                   | W1-C2 | 1.34 | W2-C5  | 1.35 | W1-C2                    | 1.963 | W2-C5  | 1.961 |
|                            | 1699.85           | W1-C3 | 1.30 | W2-C6  | 1.30 | W1-C3                    | 1.968 | W2-C6  | 1.968 |
|                            |                   | C1-O1 | 1.79 | C4-O4  | 1.80 | C1-O1                    | 1.179 | C4-O4  | 1.177 |
|                            | 1771.58           | C2-O2 | 1.78 | C5-O5  | 1.78 | C2-O2                    | 1.180 | C5-O5  | 1.181 |
|                            |                   | C3-O3 | 1.81 | C6-O6  | 1.81 | C3-O3                    | 1.177 | C6-O6  | 1.177 |
| $[Ge_5\{W(CO)_3\}_2]^{4-}$ | 1683.94           | W1-C1 | 1.36 | W 2-C4 | 1.34 | W1-C1                    | 1.958 | W 2-C4 | 1.960 |
|                            |                   | W1-C2 | 1.37 | W2-C5  | 1.38 | W1-C2                    | 1.956 | W2-C5  | 1.954 |
|                            | 1693.31           | W1-C3 | 1.34 | W2-C6  | 1.34 | W1-C3                    | 1.960 | W2-C6  | 1.960 |
|                            |                   | C1-O1 | 1.78 | C4-O4  | 1.79 | C1-O1                    | 1.180 | C4-O4  | 1.179 |
|                            | 1767.64           | C2-O2 | 1.78 | C5-O5  | 1.77 | C2-O2                    | 1.181 | C5-O5  | 1.182 |
|                            |                   | C3-O3 | 1.80 | C6-O6  | 1.79 | C3-O3                    | 1.178 | C6-O6  | 1.179 |
| $[Sn_5\{W(CO)_3\}_2]^{4-}$ | 1690.37           | W1-C1 | 1.41 | W 2-C4 | 1.40 | W1-C1                    | 1.950 | W 2-C4 | 1.951 |
|                            |                   | W1-C2 | 1.43 | W2-C5  | 1.43 | W1-C2                    | 1.949 | W2-C5  | 1.948 |

|                                                                     |         |       |      |       |      |       |       |       |       |
|---------------------------------------------------------------------|---------|-------|------|-------|------|-------|-------|-------|-------|
| [Pb <sub>5</sub> {W(CO) <sub>3</sub> } <sub>2</sub> ] <sup>4-</sup> | 1699.49 | W1-C3 | 1.39 | W2-C6 | 1.41 | W1-C3 | 1.951 | W2-C6 | 1.950 |
|                                                                     |         | C1-O1 | 1.79 | C4-O4 | 1.80 | C1-O1 | 1.179 | C4-O4 | 1.177 |
|                                                                     | 1770.97 | C2-O2 | 1.78 | C5-O5 | 1.78 | C2-O2 | 1.180 | C5-O5 | 1.180 |
|                                                                     |         | C3-O3 | 1.80 | C6-O6 | 1.79 | C3-O3 | 1.177 | C6-O6 | 1.178 |
|                                                                     | 1670.53 | W1-C1 | 1.44 | W2-C4 | 1.44 | W1-C1 | 1.942 | W2-C4 | 1.942 |
|                                                                     |         | W1-C2 | 1.46 | W2-C5 | 1.44 | W1-C2 | 1.940 | W2-C5 | 1.942 |
|                                                                     | 1683.14 | W1-C3 | 1.44 | W2-C6 | 1.46 | W1-C3 | 1.942 | W2-C6 | 1.940 |
|                                                                     |         | C1-O1 | 1.77 | C4-O4 | 1.77 | C1-O1 | 1.182 | C4-O4 | 1.181 |
|                                                                     |         | C2-O2 | 1.75 | C5-O5 | 1.77 | C2-O2 | 1.184 | C5-O5 | 1.182 |
|                                                                     | 1756.67 | C3-O3 | 1.75 | C6-O6 | 1.76 | C2-O2 | 1.182 | C5-O5 | 1.181 |

<sup>a</sup> The scaling factor  $\lambda=0.9323$  was used at M06-2X/def2-TZVPP level of theory.

**Table S18.** Energy decomposition analysis results between  $[E_5\{M(CO)_3\}]^{4-}$  and  $\{M(CO)_3\}$  fragments (A-BA') in  $[E_5\{M(CO)_3\}_2]^{4-}$  complexes (E=Si, Ge, Sn and Pb; M=Cr, Mo and W) at BP86-D3/TZP(ZORA) level of theory.

| Complex                     | $\Delta E_{\text{int}}$ | $\Delta E_{\text{Pauli}}$ | $\Delta E_{\text{elstat}}$ | $\Delta E_{\text{orb}}$ | $\Delta E_{\text{disp}}$ |
|-----------------------------|-------------------------|---------------------------|----------------------------|-------------------------|--------------------------|
| $[Si_5\{Cr(CO)_3\}_2]^{4-}$ | -233.2                  | 410.8                     | -315.5 (49%)               | -322.6 (50%)            | -5.9 (1%)                |
| $[Ge_5\{Cr(CO)_3\}_2]^{4-}$ | -202.0                  | 326.3                     | -269.0 (51%)               | -252.4 (48%)            | -6.9 (1%)                |
| $[Sn_5\{Cr(CO)_3\}_2]^{4-}$ | -182.4                  | 323.5                     | -252.2 (50%)               | -245.8 (49%)            | -8.0 (2%)                |
| $[Pb_5\{Cr(CO)_3\}_2]^{4-}$ | -163.0                  | 285.7                     | -229.1 (51%)               | -209.8 (47%)            | -9.7 (2%)                |
| $[Si_5\{Mo(CO)_3\}_2]^{4-}$ | -217.2                  | 349.8                     | -291.1 (51%)               | -269.2 (47%)            | -6.7 (1%)                |
| $[Ge_5\{Mo(CO)_3\}_2]^{4-}$ | -194.1                  | 301.1                     | -262.0 (53%)               | -226.0 (46%)            | -7.3 (1%)                |
| $[Sn_5\{Mo(CO)_3\}_2]^{4-}$ | -178.3                  | 351.0                     | -284.5 (54%)               | -236.9 (45%)            | -7.9 (2%)                |
| $[Pb_5\{Mo(CO)_3\}_2]^{4-}$ | -164.9                  | 309.3                     | -257.6 (54%)               | -206.9 (44%)            | -9.7 (2%)                |
| $[Si_5\{W(CO)_3\}_2]^{4-}$  | -227.1                  | 315.7                     | -290.9 (54%)               | -244.7 (45%)            | -7.2 (1%)                |
| $[Ge_5\{W(CO)_3\}_2]^{4-}$  | -223.6                  | 394.5                     | -340.6 (55%)               | -269.7 (44%)            | -7.8 (1%)                |
| $[Sn_5\{W(CO)_3\}_2]^{4-}$  | -199.1                  | 398.7                     | -328.9 (55%)               | -260.6 (44%)            | -8.3 (1%)                |
| $[Pb_5\{W(CO)_3\}_2]^{4-}$  | -185.7                  | 353.8                     | -302.3 (56%)               | -227.1 (42%)            | -10.1 (2%)               |

**Table S19.** Comparison of computed Ge-Ge distances (Å) for trigonal bipyramid  $Ge_5^{2-}$  cluster in Ref. 43 and in this study.

| Distances (Å) | Ref. 43       | This study      |                   |
|---------------|---------------|-----------------|-------------------|
|               | B3LYP/LANL2DZ | BP86/def2-TZVPP | M06-2X/def2-TZVPP |
| Ge1—Ge4       | 2.577         | 2.558           | 2.536             |
| Ge1—Ge5       | 2.577         | 2.559           | 2.536             |
| Ge2—Ge4       | 2.577         | 2.558           | 2.536             |
| Ge2—Ge5       | 2.577         | 2.557           | 2.537             |
| Ge3—Ge4       | 2.577         | 2.558           | 2.537             |
| Ge3—Ge5       | 2.577         | 2.556           | 2.538             |
| Ge1—Ge2       | 2.818         | 2.762           | 2.724             |
| Ge1—Ge3       | 2.818         | 2.762           | 2.724             |
| Ge2—Ge3       | 2.818         | 2.761           | 2.724             |
| Ge4...Ge5     | 3.997         | 4.000           | 3.980             |
| RMS           | 0.107         | 0.080           | 0.060             |

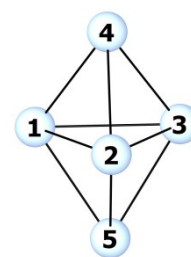

**Table S20.** Comparison of computed Ge–Ge distances (Å) for trigonal bipyramid  $Ge_5$  cluster in Ref. 43 and in this study.

| Distances<br>(Å) | Ref. 43                                       | This study      |                   |
|------------------|-----------------------------------------------|-----------------|-------------------|
|                  | B3LYP/LANL2DZ                                 | BP86/def2-TZVPP | M06-2X/def2-TZVPP |
| Ge1—Ge4          | 2.491                                         | 2.464           | 2.458             |
| Ge1—Ge5          | 2.491                                         | 2.464           | 2.458             |
| Ge2—Ge4          | 2.491                                         | 2.464           | 2.458             |
| Ge2—Ge5          | 2.491                                         | 2.464           | 2.457             |
| Ge3—Ge4          | 2.491                                         | 2.464           | 2.458             |
| Ge3—Ge5          | 2.491                                         | 2.464           | 2.457             |
| Ge1...Ge2        | 3.351                                         | 3.284           | 3.281             |
| Ge1...Ge3        | 3.351                                         | 3.284           | 3.280             |
| Ge2...Ge3        | 3.351                                         | 3.284           | 3.280             |
| Ge4—Ge5          | 3.141                                         | 3.147           | 3.133             |
| RMS              | There is not experimental data for comparison |                 |                   |

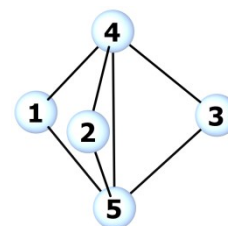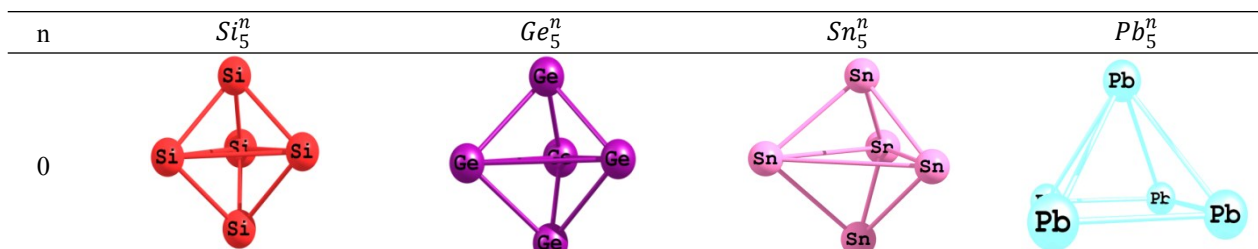



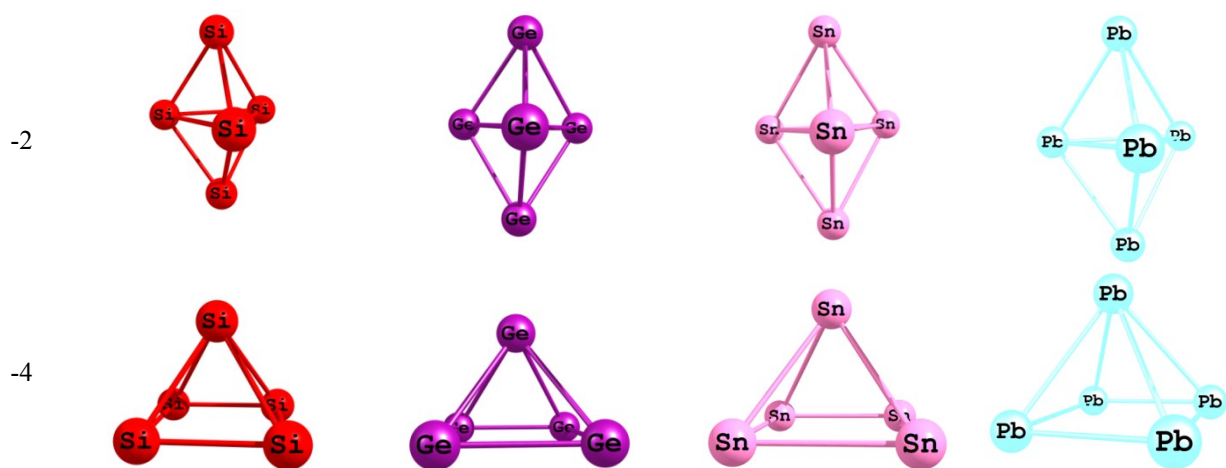

**Figure S1.** Optimized structures of  $E_5^n$  ( $E = Si, Ge, Sn, Pb; n = -4, -2, 0$ ) clusters from square pyramid initial ( $C_{4v}$ ) geometry, at M06-2X/def2-TZVPP level of theory.

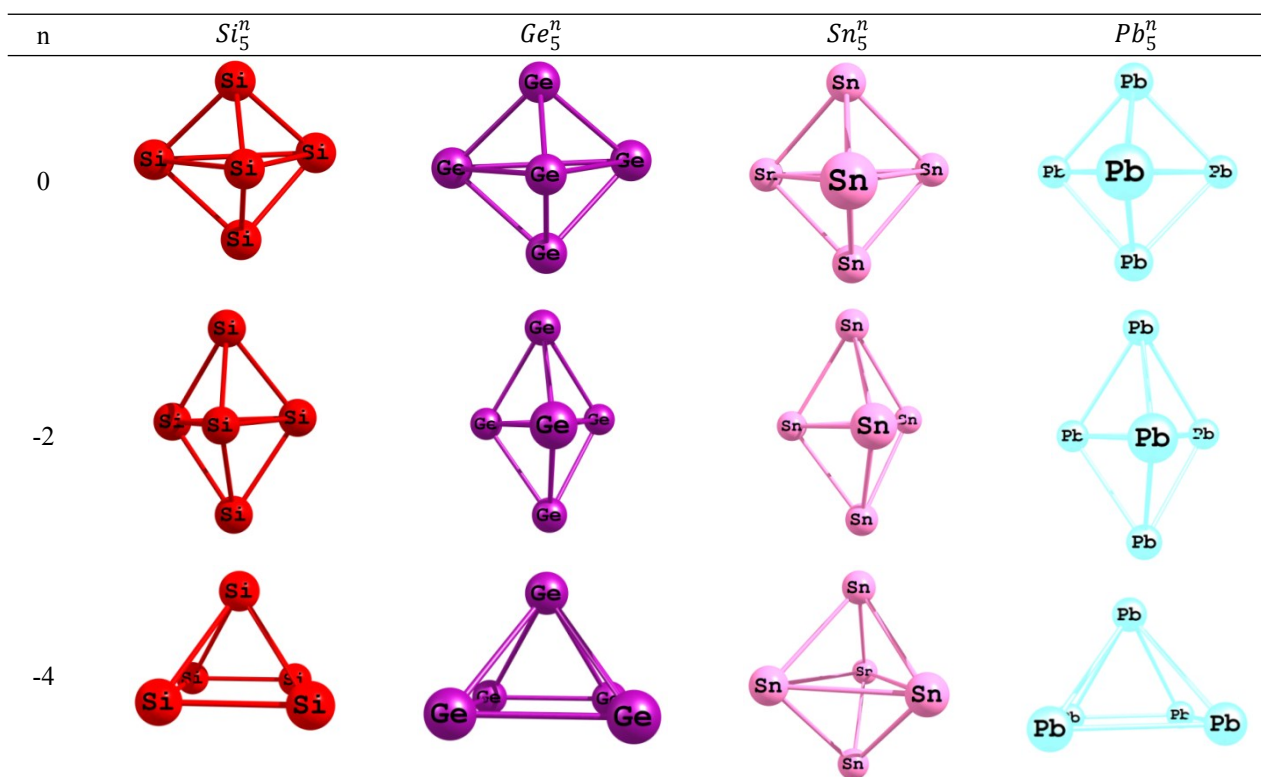

**Figure S2.** Optimized structures of  $E_5^n$  ( $E = Si, Ge, Sn, Pb; n = -4, -2, 0$ ) clusters from trigonal bipyramid ( $D_{3h}$ ) initial geometry, at M06-2X/def2-TZVPP level of theory.

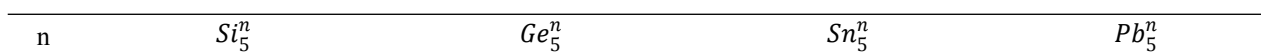

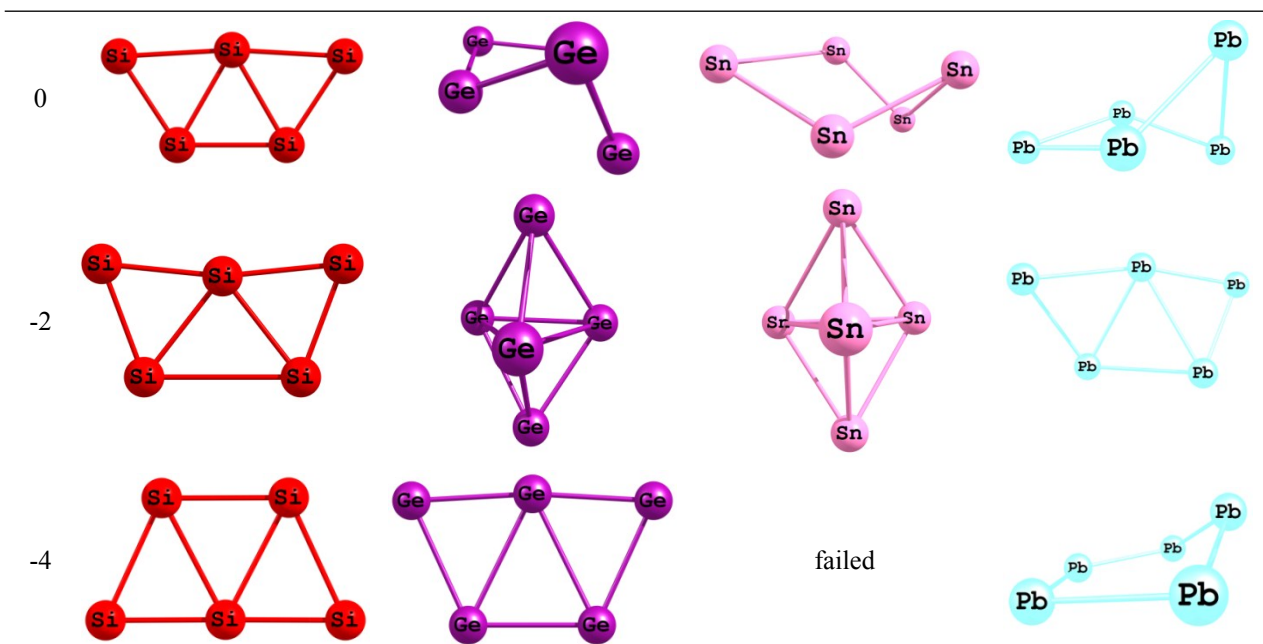

**Figure S3.** Optimized structures of  $E_5^n$  ( $E = Si, Ge, Sn, Pb; n = -4, -2, 0$ ) clusters from planar pentagon ( $D_{5h}$ ) initial geometry, at M06-2X/def2-TZVPP level of theory.

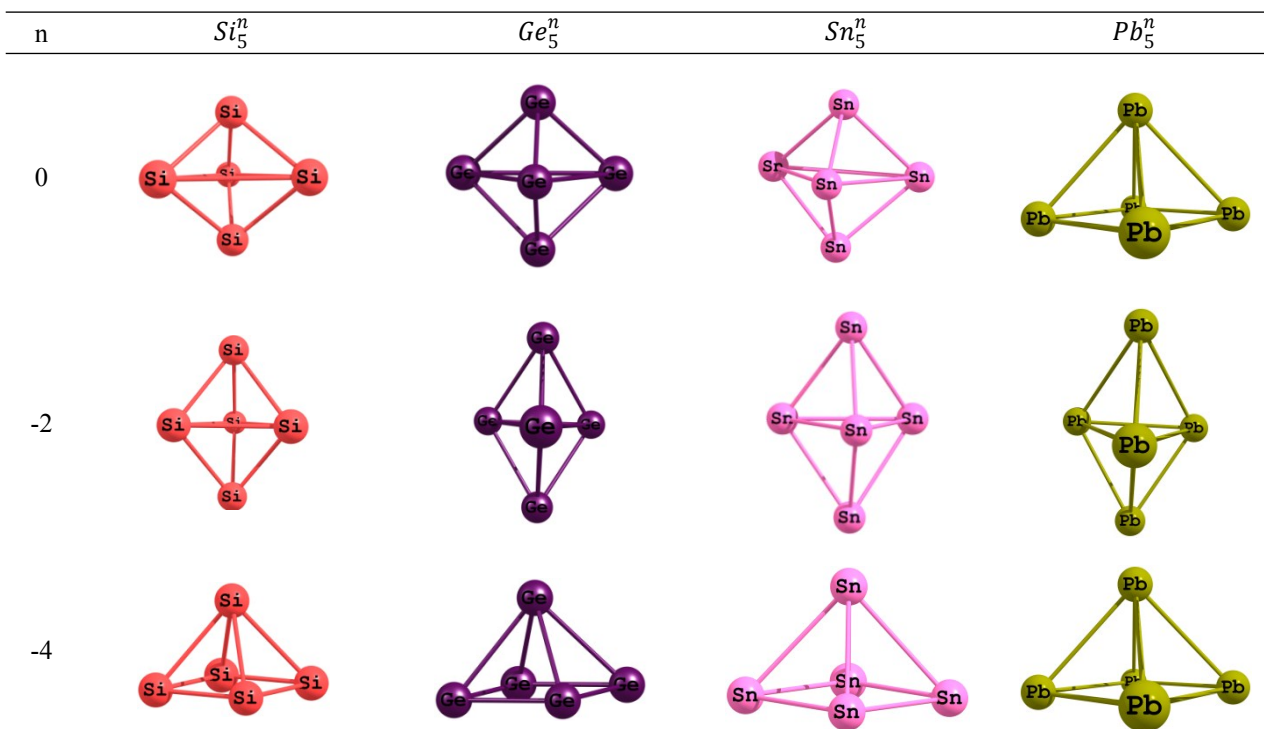

**Figure S4.** Optimized structures of  $E_5^n$  ( $E = Si, Ge, Sn, Pb; n = -4, -2, 0$ ) clusters from square pyramid ( $C_{4v}$ ) initial geometry, at BP86/def2-TZVPP level of theory.

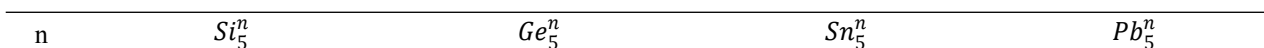

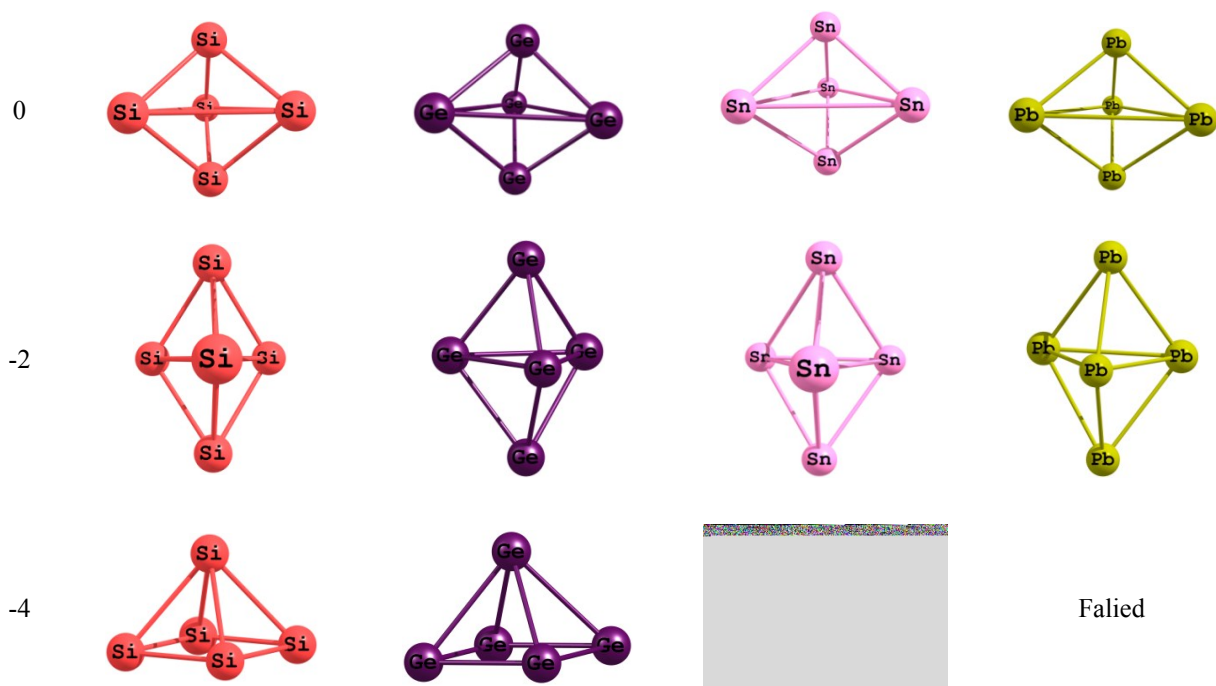

**Figure S5.** Optimized structures of  $E_5^n$  ( $E = Si, Ge, Sn, Pb; n = -4, -2, 0$ ) clusters from trigonal bipyramid ( $D_{3h}$ ) initial geometry, at BP86/def2-TZVPP level of theory.

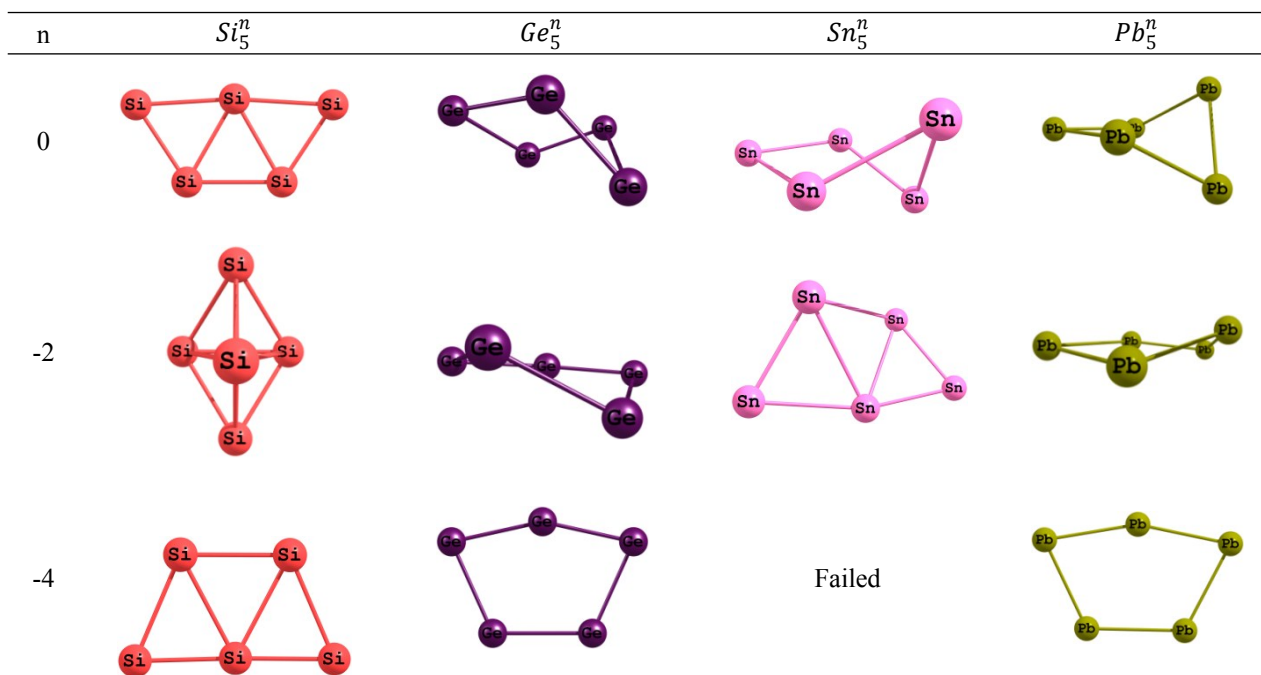

**Figure S6.** Optimized structures of  $E_5^n$  ( $E = Si, Ge, Sn, Pb; n = -4, -2, 0$ ) clusters from planar pentagon ( $D_{5h}$ ) initial geometry, at BP86/def2-TZVPP level of theory.

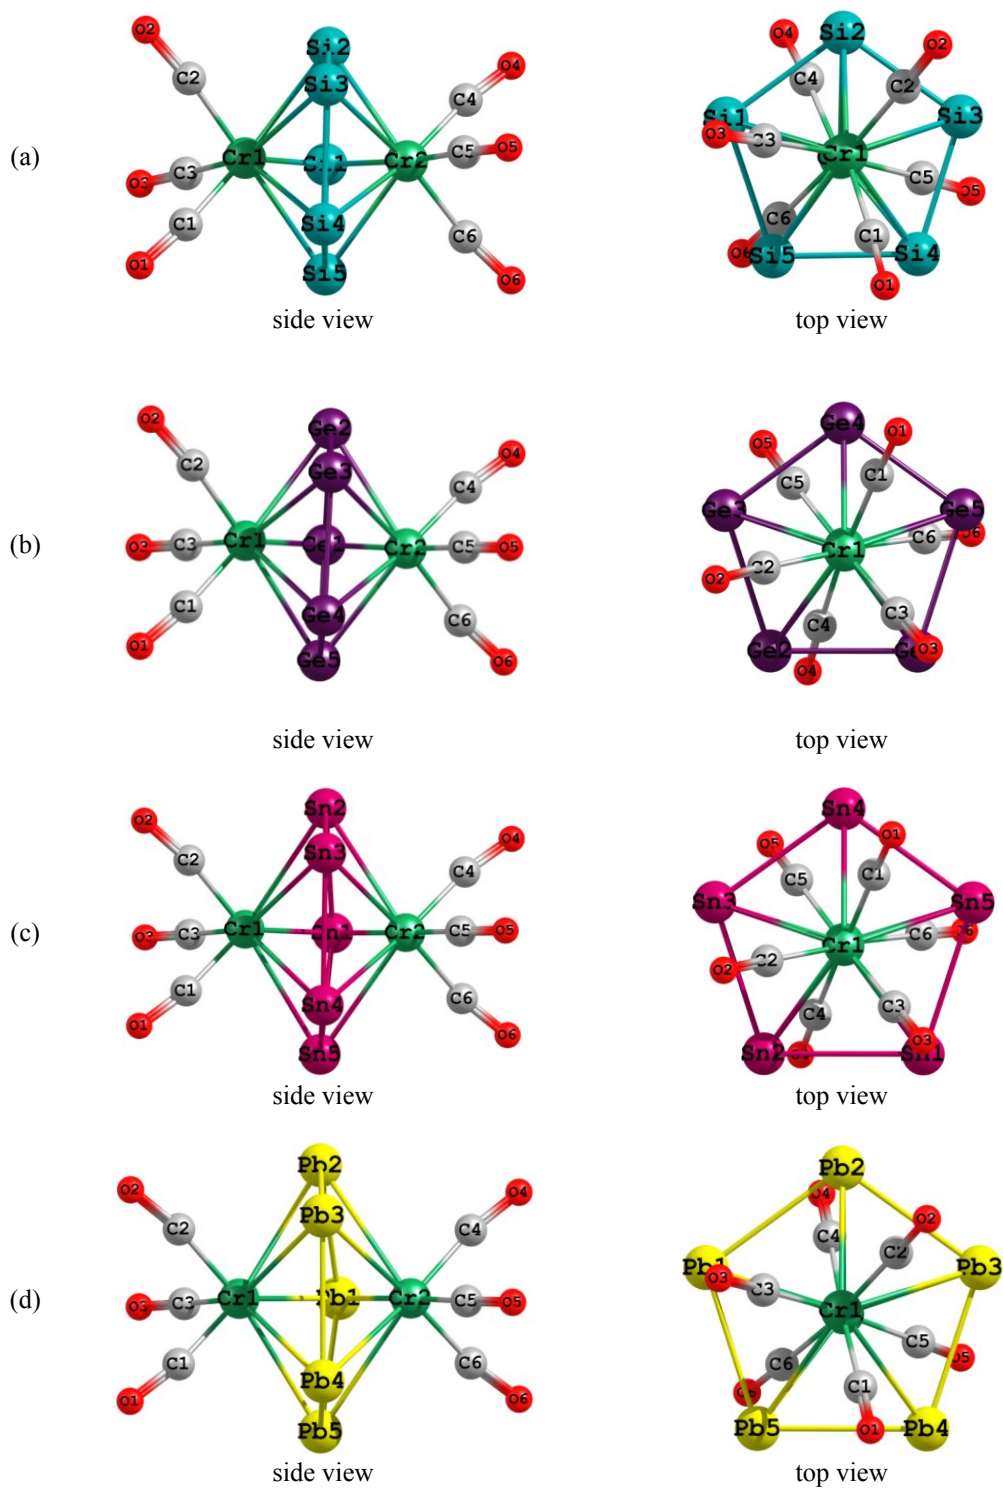

**Figure S7.** Optimized structures for  $[Si_5\{Cr(CO)_3\}_2]^{4-}$  (a),  $[Ge_5\{Cr(CO)_3\}_2]^{4-}$  (b),  $[Sn_5\{Cr(CO)_3\}_2]^{4-}$  (c) and  $[Pb_5\{Cr(CO)_3\}_2]^{4-}$  (d) complexes, at M06-2X/def2-TZVPP level of theory.

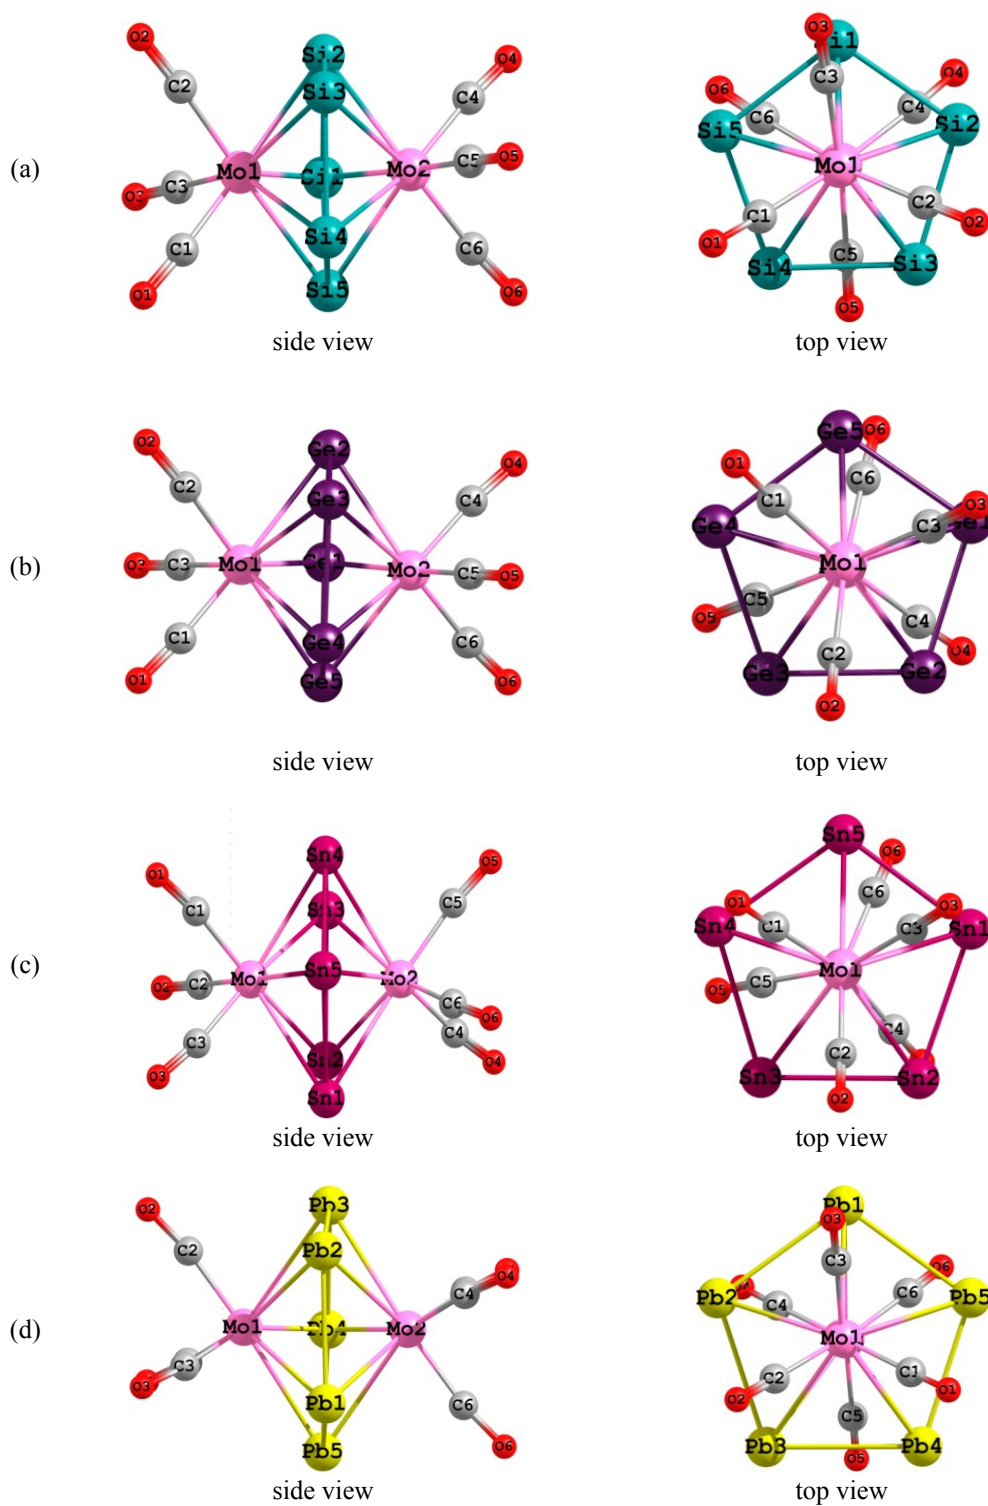

**Figure S8.** Optimized structures for  $[Si_5\{Mo(CO)_3\}_2]^{4-}$  (a),  $[Ge_5\{Mo(CO)_3\}_2]^{4-}$  (b),  $[Sn_5\{Mo(CO)_3\}_2]^{4-}$  (c) and  $[Pb_5\{Mo(CO)_3\}_2]^{4-}$  (d) complexes, at M06-2X/def2-TZVPP level of theory.

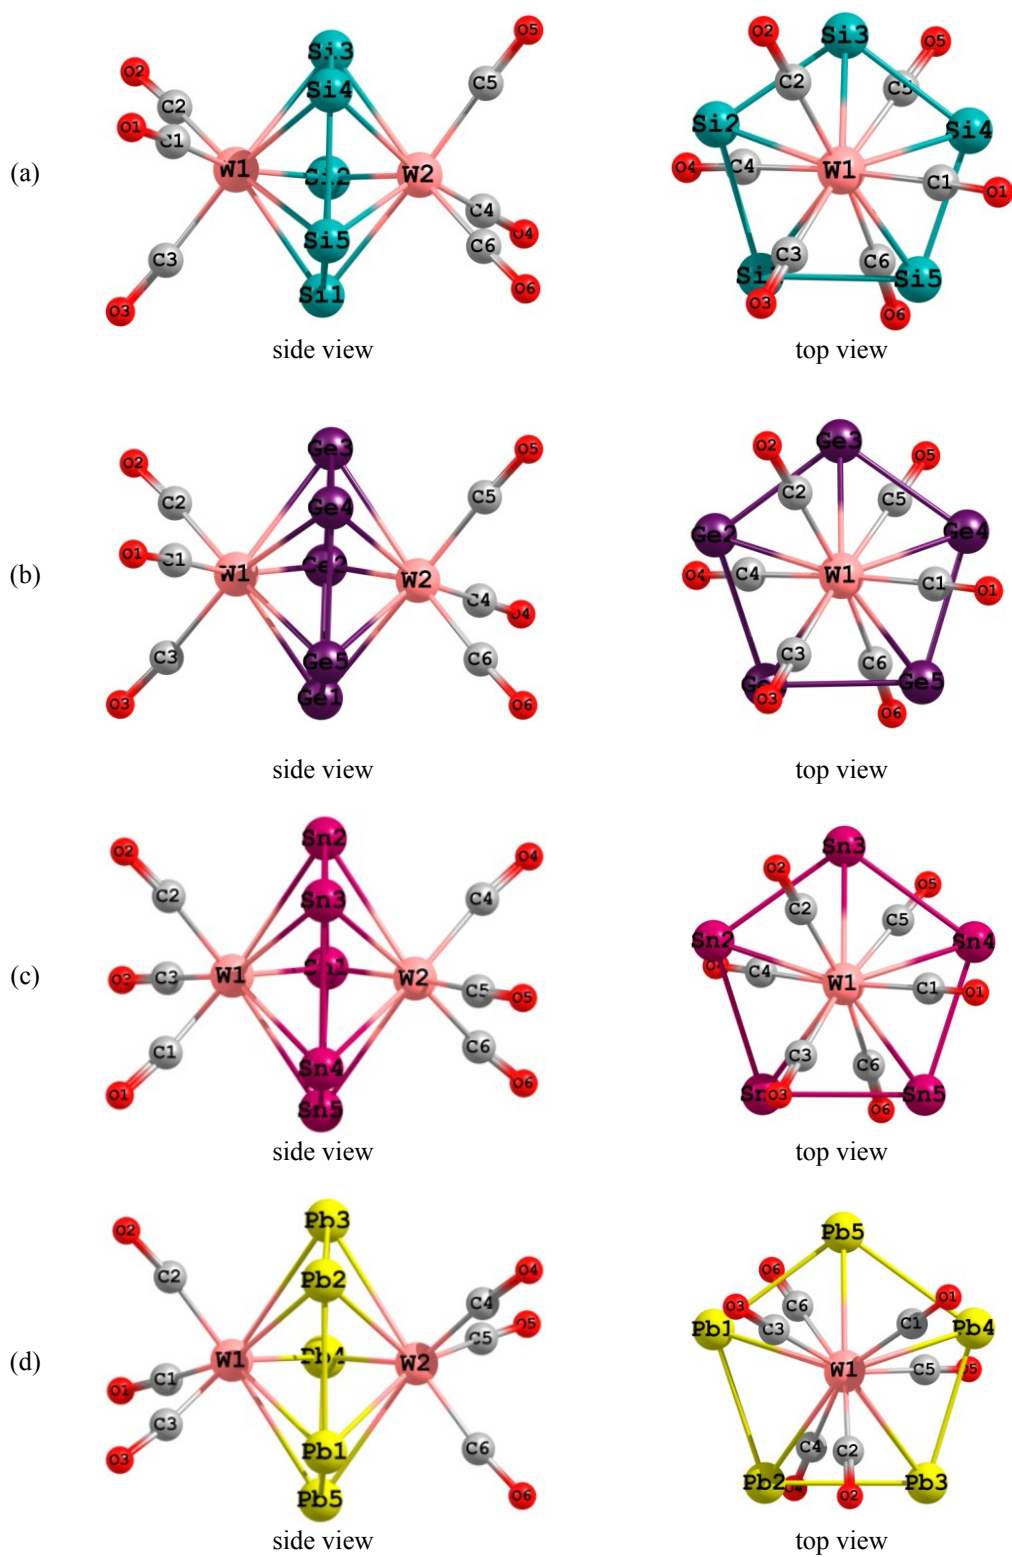

**Figure S9.** Optimized structures for  $[Si_5\{W(CO)_3\}_2]^{4-}$  (a),  $[Ge_5\{W(CO)_3\}_2]^{4-}$  (b),  $[Sn_5\{W(CO)_3\}_2]^{4-}$  (c) and  $[Pb_5\{W(CO)_3\}_2]^{4-}$  (d) complexes, at M06-2X/def2-TZVPP level of theory.

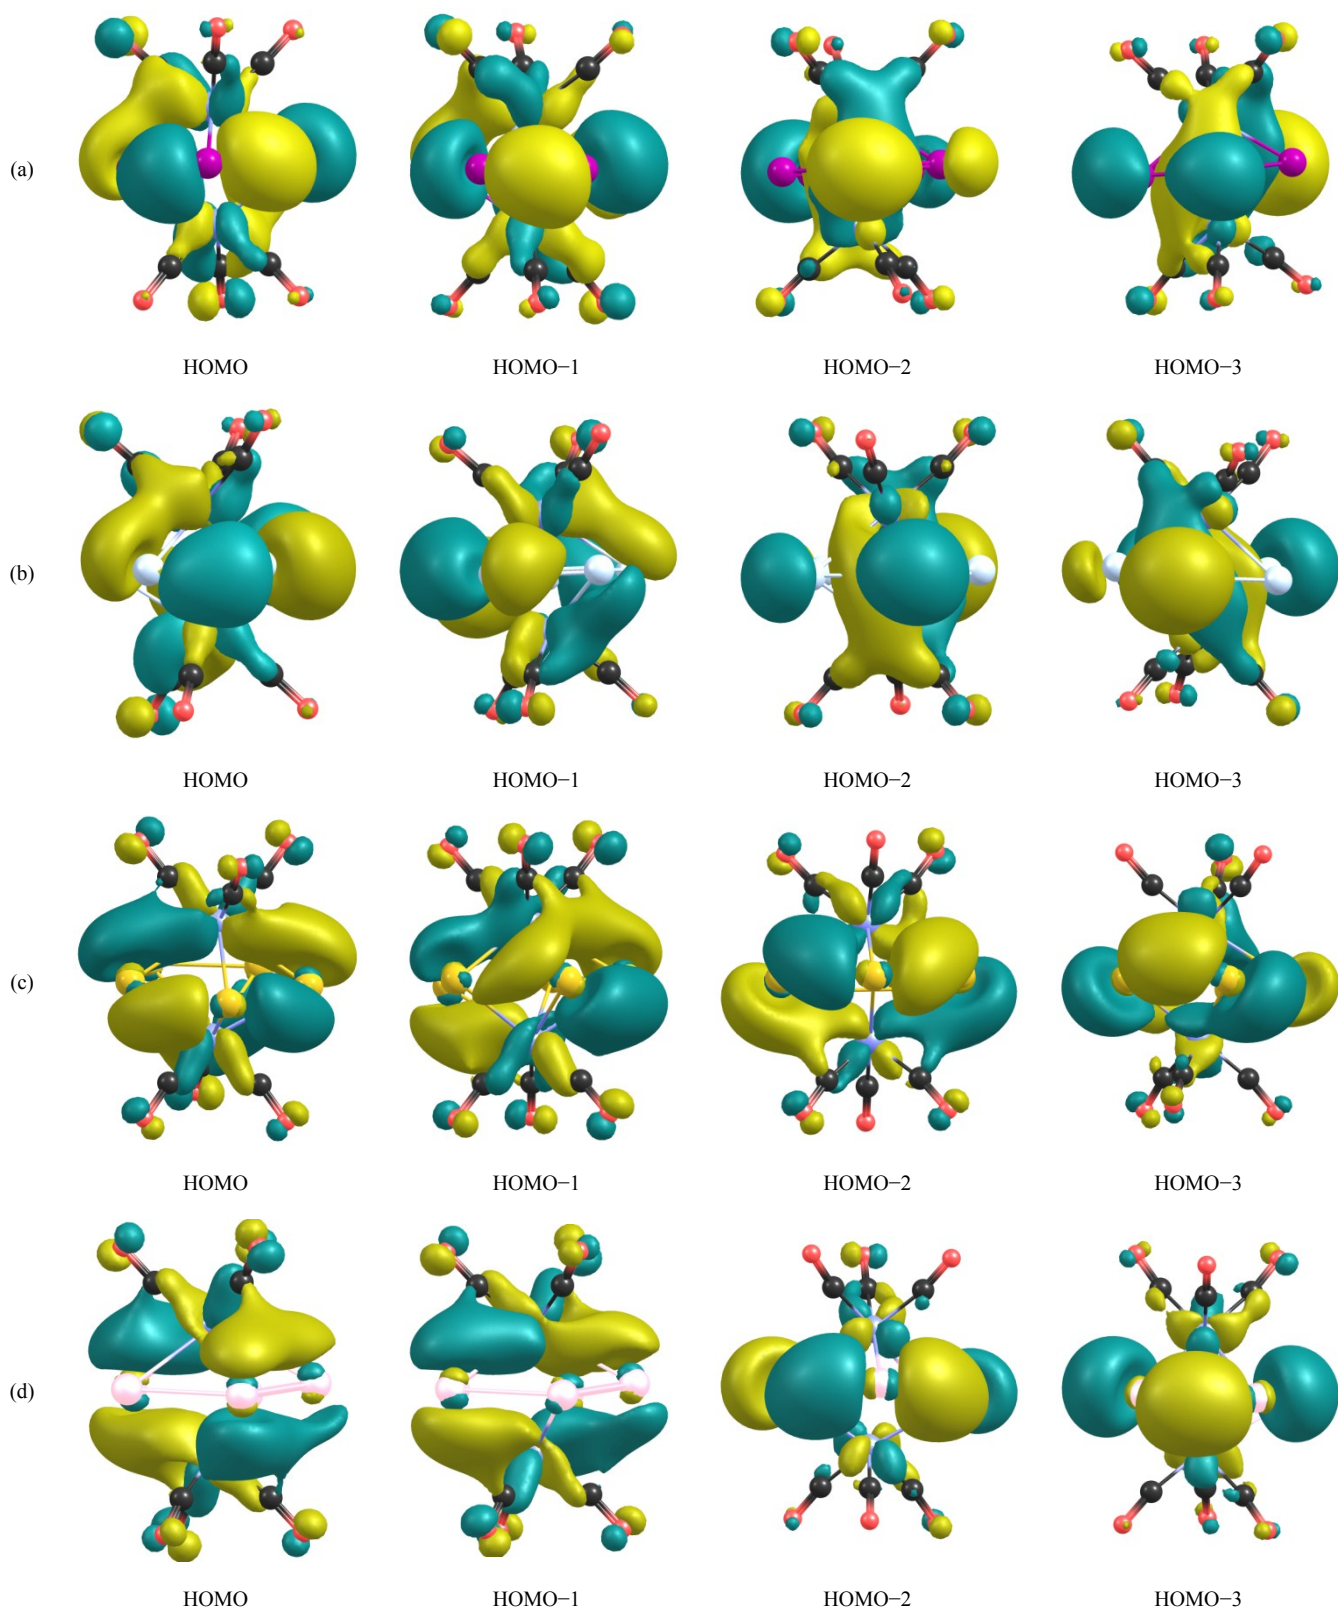

**Figure S10.** Four highest occupied molecular orbitals for  $[Si_5\{Cr(CO)_3\}_2]^{4-}$  (a),  $[Ge_5\{Cr(CO)_3\}_2]^{4-}$  (b),  $[Sn_5\{Cr(CO)_3\}_2]^{4-}$  (c) and  $[Pb_5\{Cr(CO)_3\}_2]^{4-}$  (d) complexes, at M06-2X/def2-TZVPP level of theory.

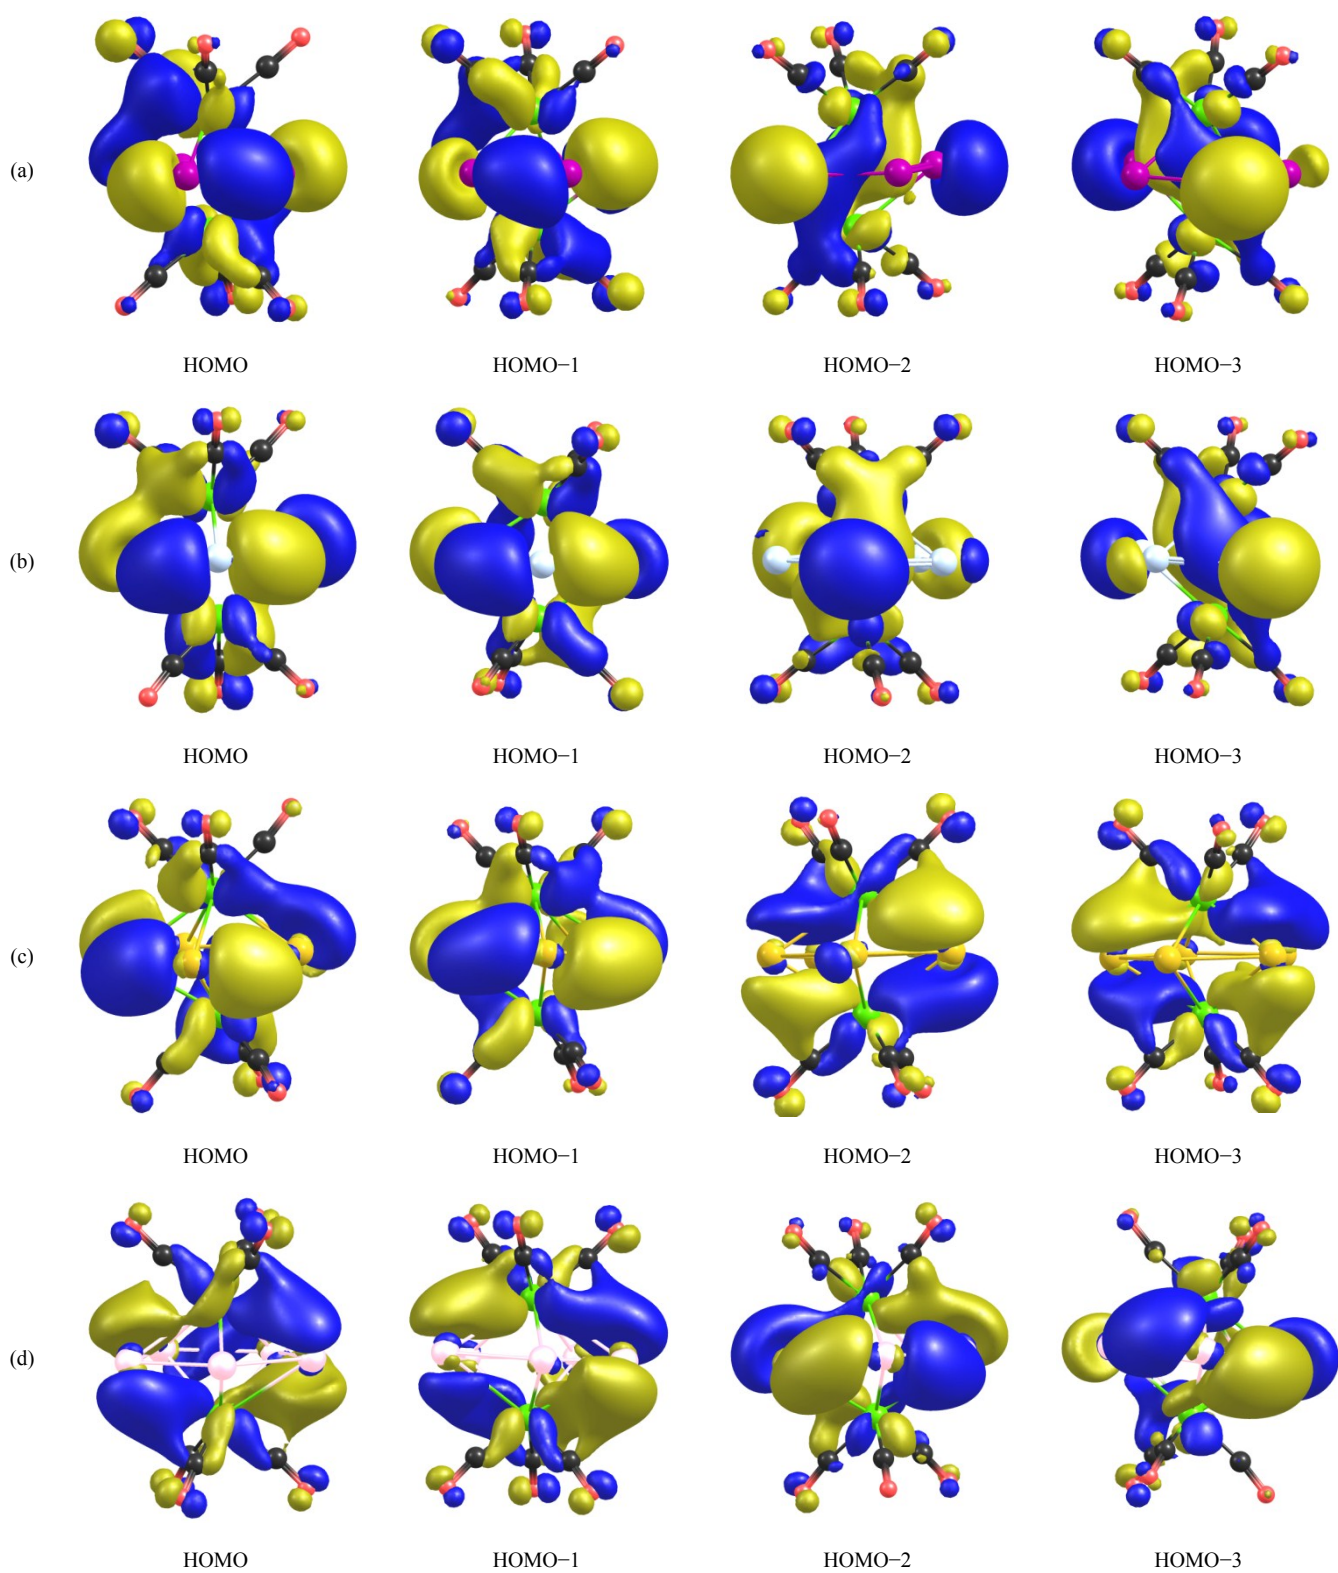

**Figure S11.** Four highest occupied molecular orbitals for  $[Si_5\{Mo(CO)_3\}_2]^{4-}$  (a),  $[Ge_5\{Mo(CO)_3\}_2]^{4-}$  (b),  $[Sn_5\{Mo(CO)_3\}_2]^{4-}$  (c) and  $[Pb_5\{Mo(CO)_3\}_2]^{4-}$  (d) complexes, at M06-2X/def2-TZVPP level of theory.



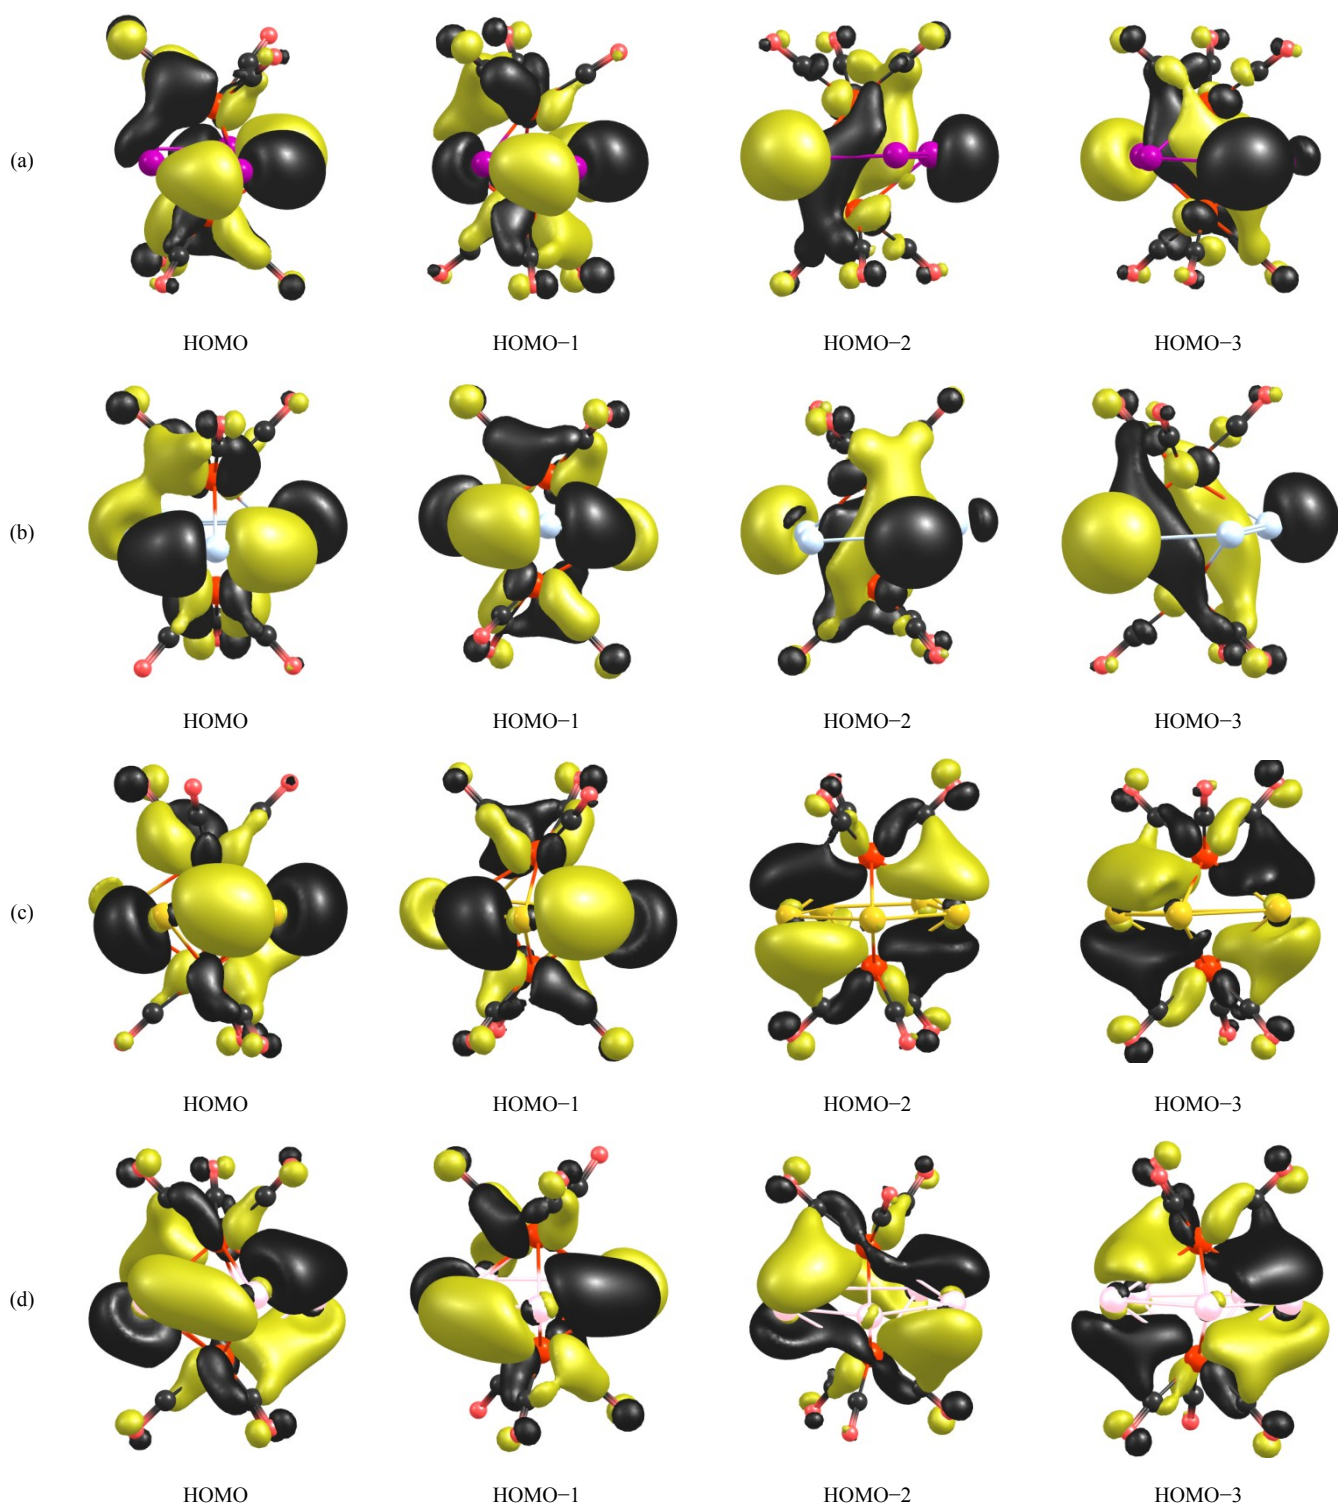

**Figure S12.** Four highest occupied molecular orbitals for  $[Si_5\{W(CO)_3\}_2]^{4-}$  (a),  $[Ge_5\{W(CO)_3\}_2]^{4-}$  (b),  $[Sn_5\{W(CO)_3\}_2]^{4-}$  (c) and  $[Pb_5\{W(CO)_3\}_2]^{4-}$  (d) complexes, at M06-2X/def2-TZVPP level of theory.

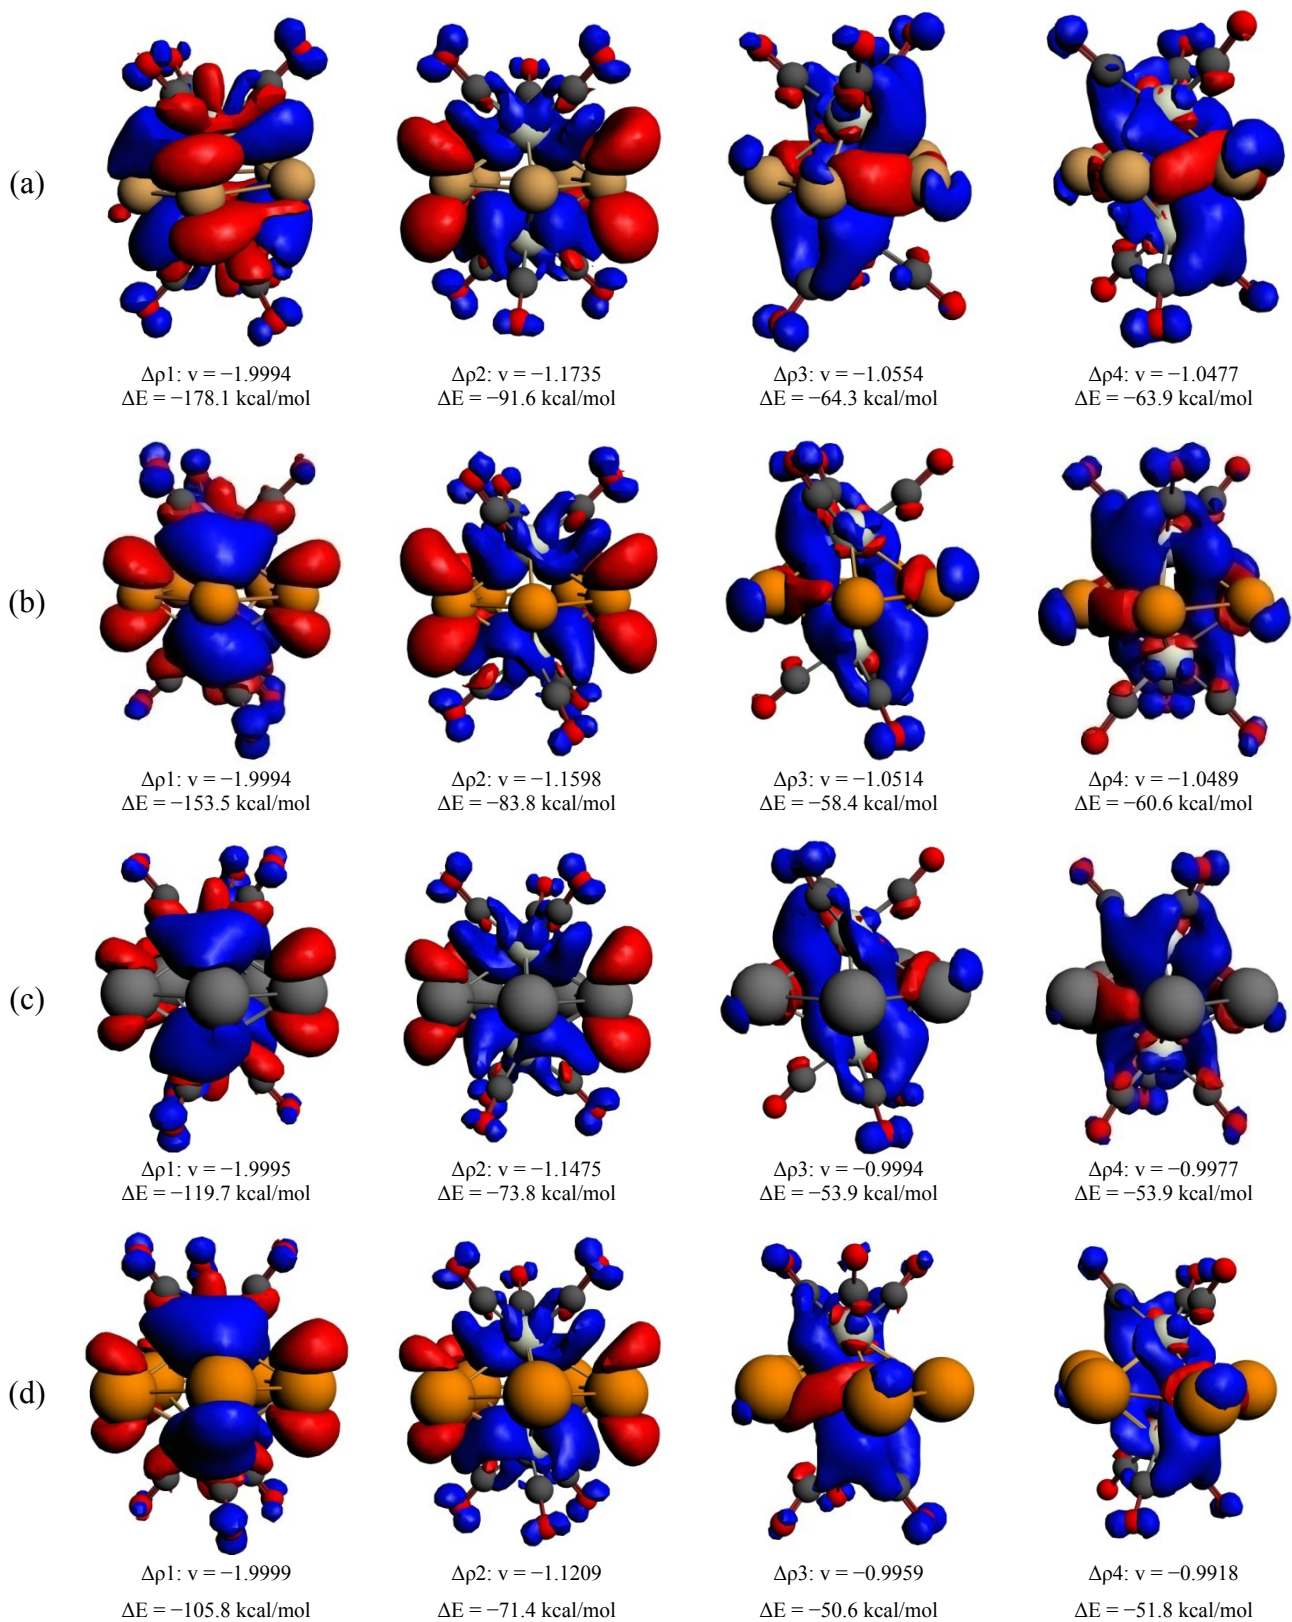

**Figure S13.** Deformation densities associated with the first four important orbital interactions for  $[Si_5\{Cr(CO)_3\}_2]^{4-}$  (a),  $[Ge_5\{Cr(CO)_3\}_2]^{4-}$  (b),  $[Sn_5\{Cr(CO)_3\}_2]^{4-}$  (c) and  $[Pb_5\{Cr(CO)_3\}_2]^{4-}$  (d) complexes, at BP86-D3/TZP(ZORA) level of theory.

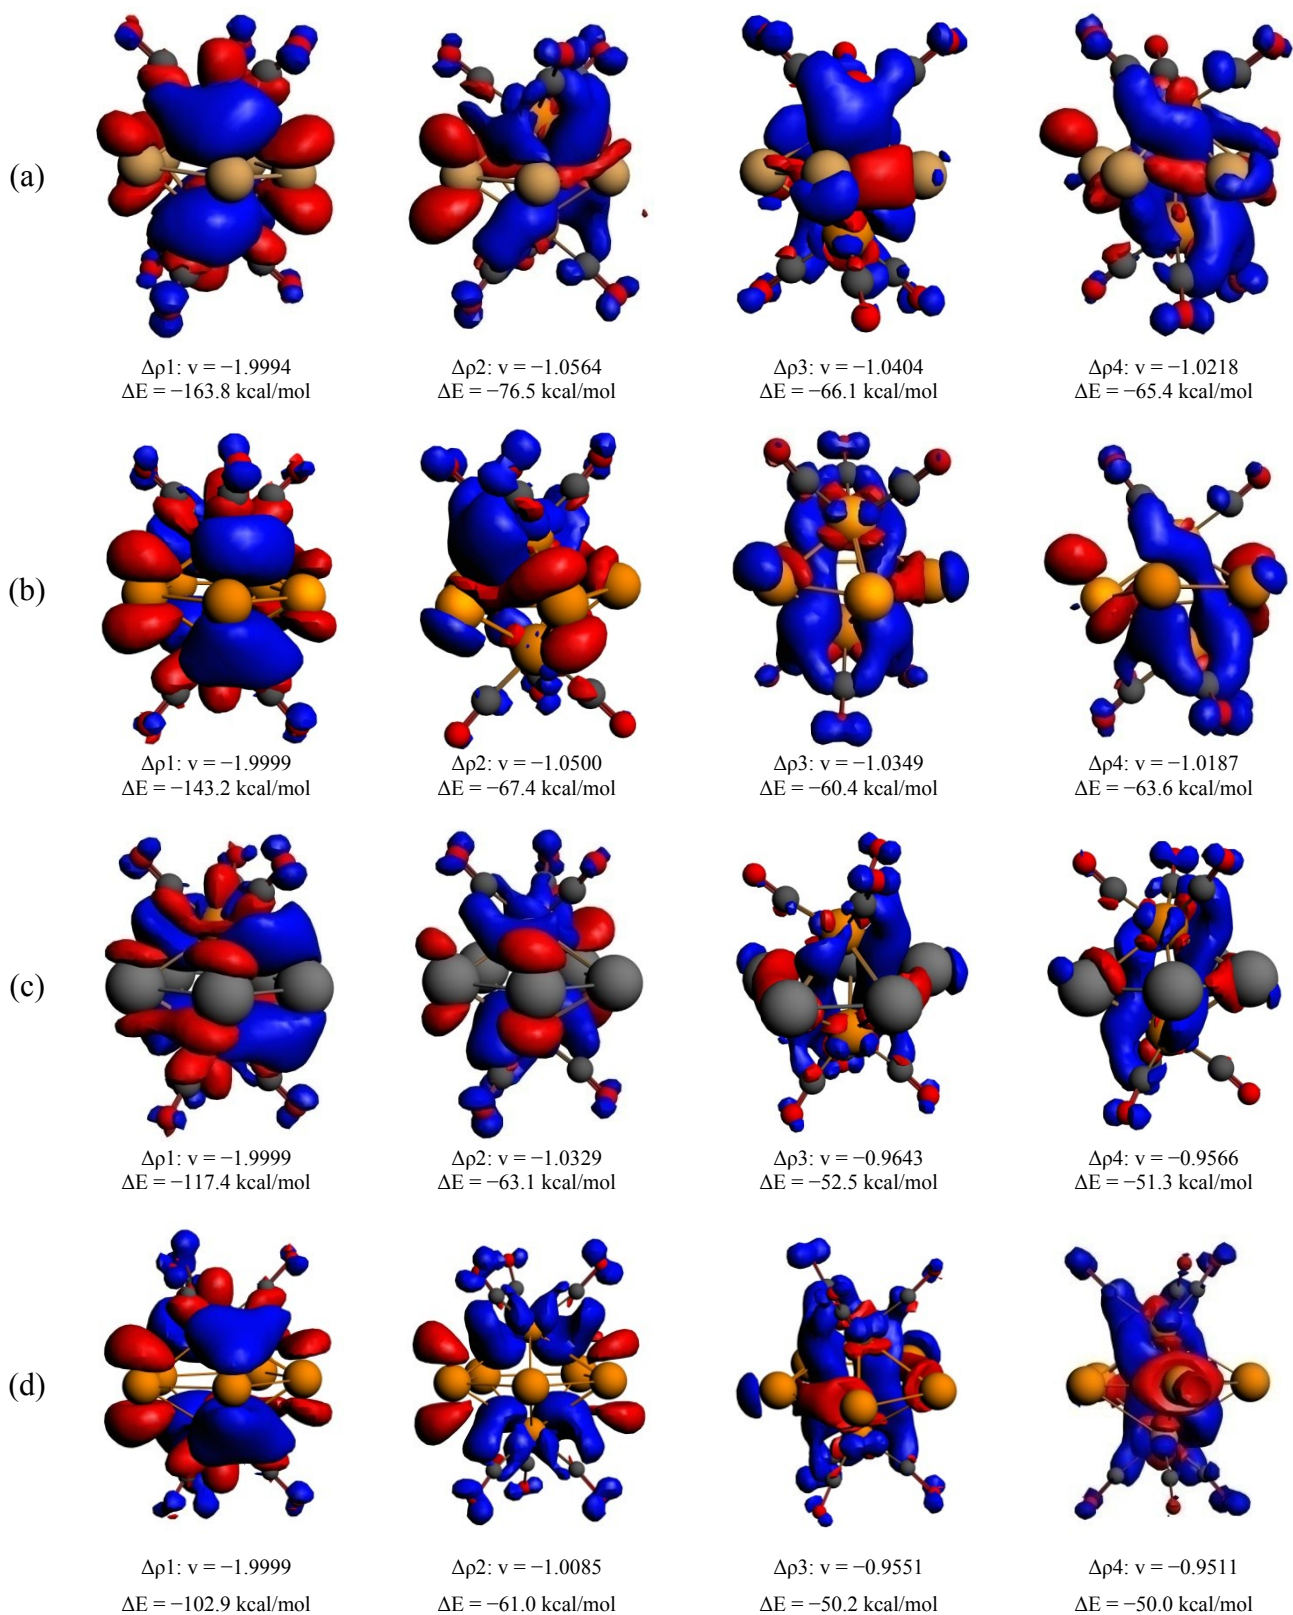

**Figure S14.** Deformation densities associated with the first four important orbital interactions for  $[Si_5\{Mo(CO)_3\}_2]^{4-}$  (a),  $[Ge_5\{Mo(CO)_3\}_2]^{4-}$  (b),  $[Sn_5\{Mo(CO)_3\}_2]^{4-}$  (c) and  $[Pb_5\{Mo(CO)_3\}_2]^{4-}$  (d) complexes, at BP86-D3/TZP(ZORA) level of theory.

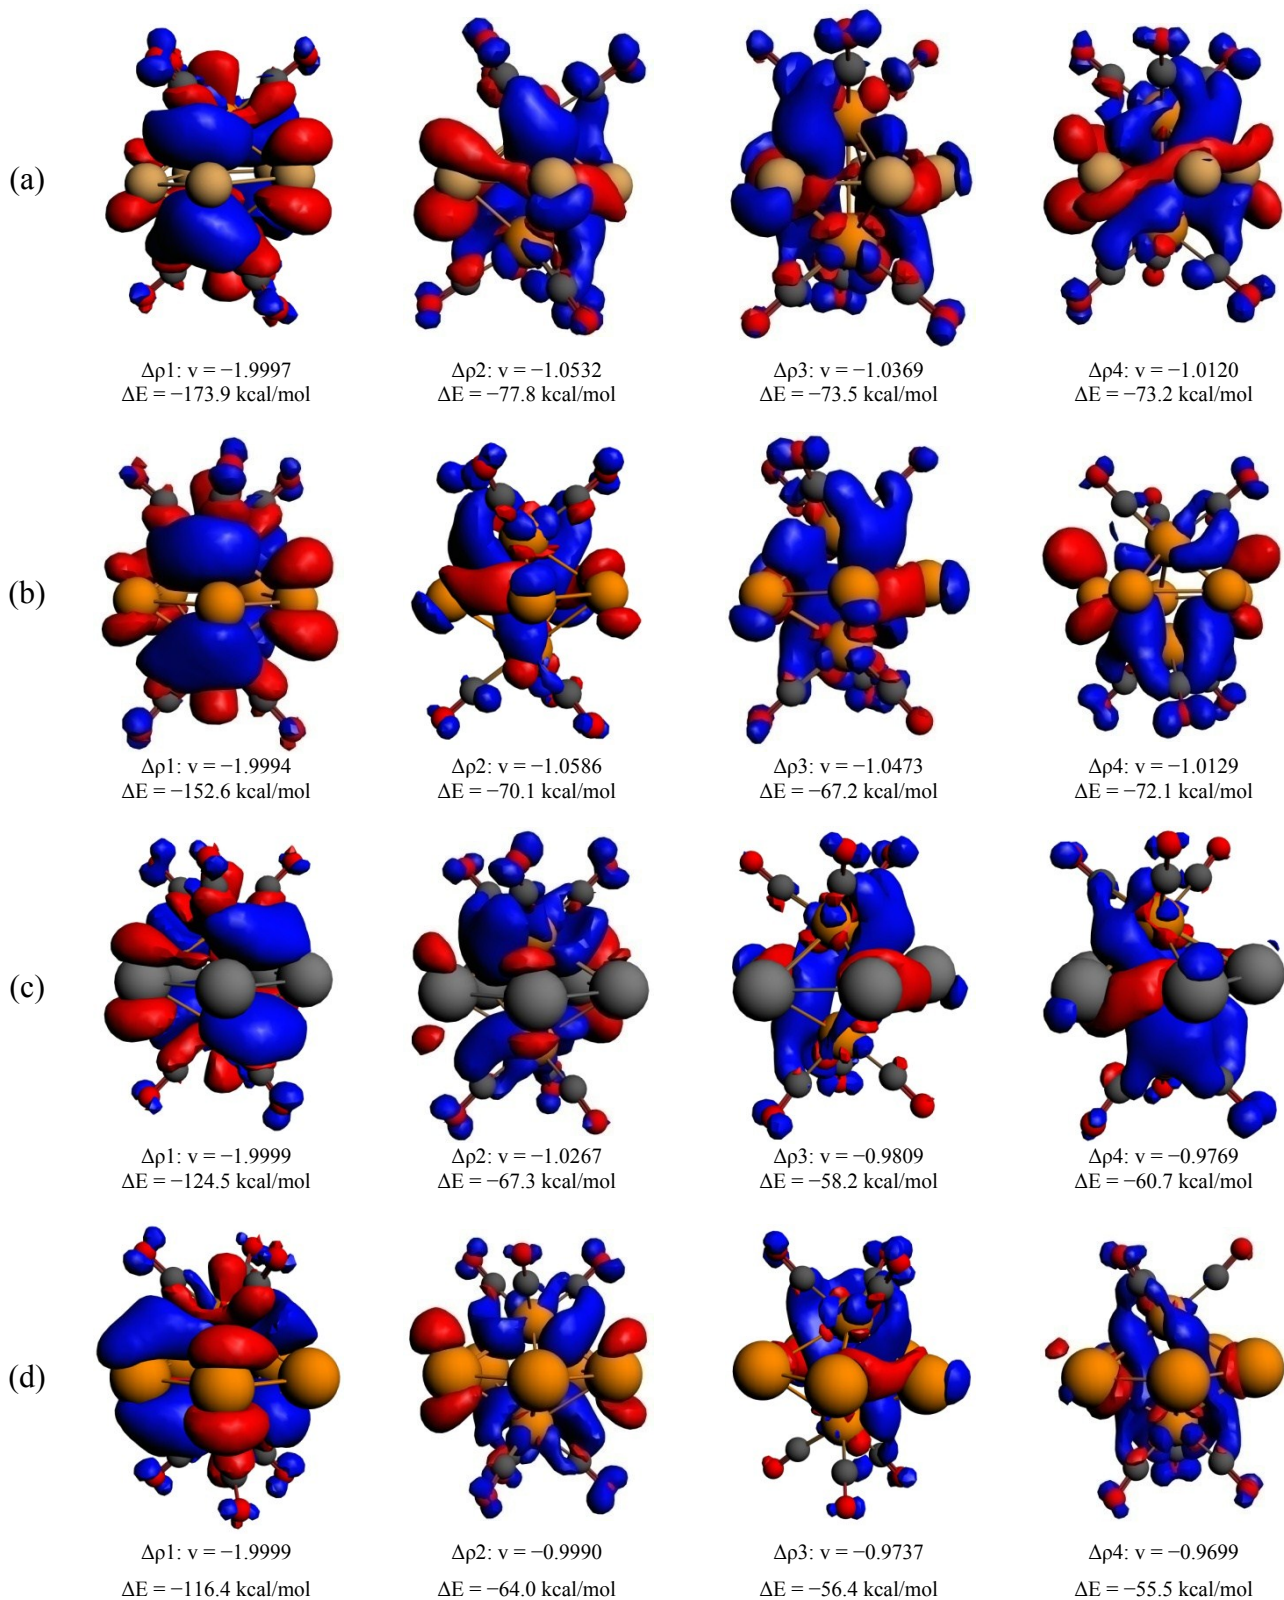

**Figure S15.** Deformation densities associated with the first four important orbital interactions for  $[Si_5\{W(CO)_3\}_2]^{4-}$  (a),  $[Ge_5\{W(CO)_3\}_2]^{4-}$  (b),  $[Sn_5\{W(CO)_3\}_2]^{4-}$  (c) and  $[Pb_5\{W(CO)_3\}_2]^{4-}$  (d) complexes, at BP86-D3/TZP(ZORA) level of theory.

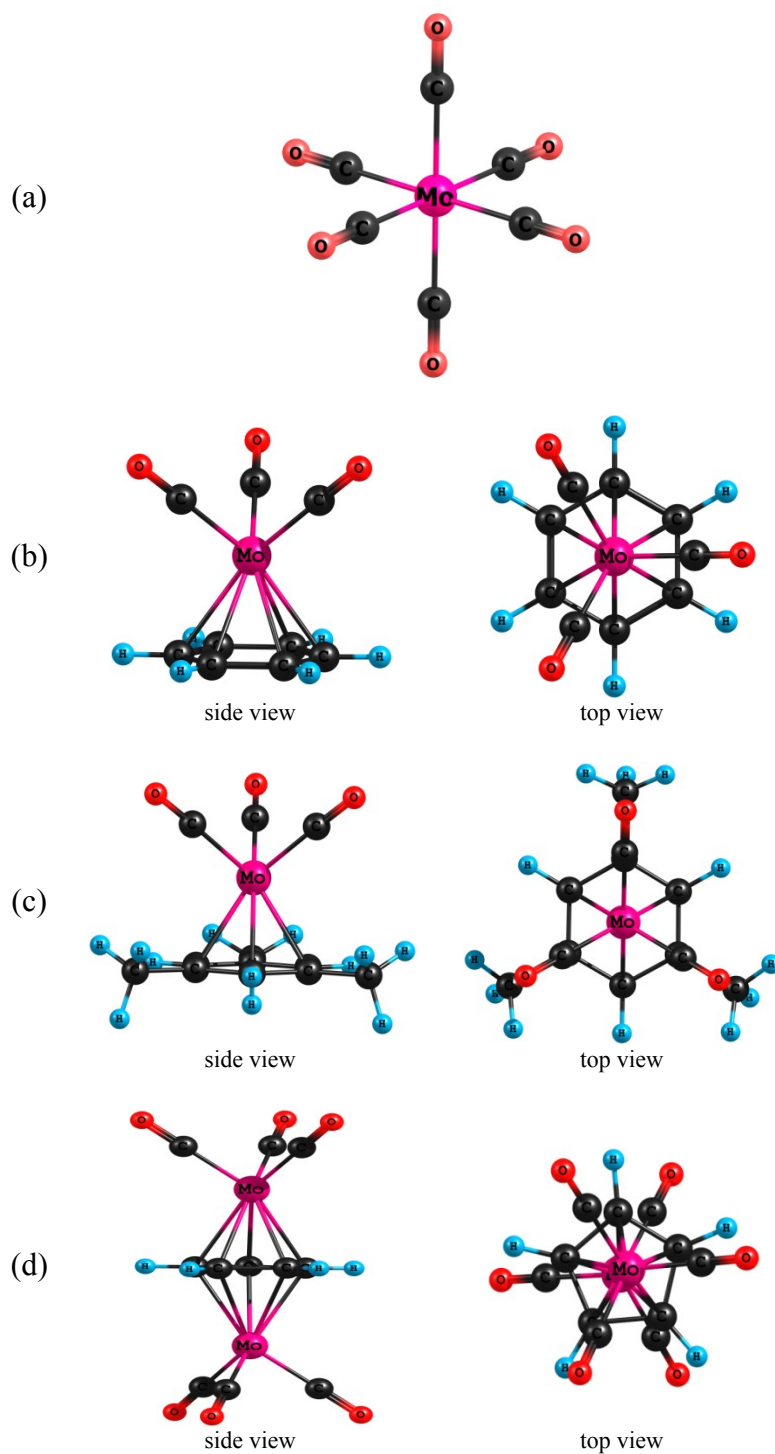

**Figure S16.** Optimized structures for  $[\text{Mo}(\text{CO})_6]$  (a),  $[(\eta^6\text{-C}_6\text{H}_6)\{\text{Mo}(\text{CO})_3\}]$  (b),  $[\text{Mes}\{\text{Mo}(\text{CO})_3\}]$  (c) and  $[(\eta^5\text{-C}_5\text{H}_5)\{\text{Mo}(\text{CO})_3\}_2]^-$  (d) complexes, at M06-2X/def2-TZVPP level of theory.
